# Supplementary material for: The life cycle assessment of a UK data centre
Source: Springer Nature journal article supplement (doi:10.1007/s11367-014-0838-7), 2015-01-12
Supplement: MOESM1 [file 11367_2014_838_MOESM1_ESM.docx]

**Online resource 1**

##### Assumptions – Fire Infrastructure

Assumed cost for the **fire system**

| Component: | Fire System |  |
| --- | --- | --- |
| Cost: | £2,420,136 | Estimated final cost (2009) – **Primary data source** |
| 2009 USD: | $3,787,331 |  |
| 2002 USD: | $3,175,867 |  |
| Replacement every (years): | 20 |  |
| Number of refreshes: | 3 |  |
| Total cost over 60 years, 2002 USD: | $9,527,600 |  |
| **Cost per kW of IT per year:** | **12.3** | **$/kW/year** |
| System self-weight (kg): | 3,271 |  |
| Number of refreshes: | 3 |  |
| **Weight per kW of IT per year:** | **0.0127** | **kg/kW/year** |

Assumptions made in determining the components of the **fire system** inventory

| **Component** | | **Assumptions** |
| --- | --- | --- |
| Fire  system | Costing | Cost taken from a project cost report. The cost given in the report is for the first stage of work. In the second stage it has been assumed that an additional 4 halls will be added along with a further Communications and Vendor Access Room. There will be less additional plant (in the ancillary areas) than in the first stage. As a result the cost for stage 2 has been estimated at 80% of the stage 1 cost.  N.B. The fire system cost would include the cost of the pipework (modelled separately). In the first instance, and conservatively, no effort has been made to omit this cost as it is unlikely the fire system will be a model hotspot. Future modelling should improve this figure. |
|  | Modelling | Modelled as NAICS sector 334290 - Other Communications Equipment Manufacturing, and in particular *‘Fire detection and alarm system manufacturing’* |
|  | Components | Includes: sprinklers; alarms; smoke, flame and heat detectors; visual warning devices; manual break glass alarms; Vesda sampling points; MASDS smoke detectors; sub fire indicator panels; vesda compacts; pre-action sprinkler indicator panels; air maintenance units; vesda scanners. |

Assumed weight for the **pipework**

| Component: | Pipework |  |
| --- | --- | --- |
| System self-weight (kg): | 42,529 | Drawings  **(Primary data source**) |
| Replacement every (years): | 20 |  |
| Number of refreshes: | 3 |  |
| Total weight over 60 years (kg): | 127,587 |  |
| **Weight per kW of IT per year:** | **0.1649** | **kg/kW/year** |

Assumptions made in determining the **pipework** inventory

| **Component** | | **Assumptions** |
| --- | --- | --- |
| Pipework | Size | Pipes range in size from 25 mm to 150 mm therefore an average of 90mm is assumed for all pipes |
|  | Material | PVC assumed for all |
|  | Specification | Durapipe  size 3 class E 15 bar @20oC, self-weight = 2.13 kg/m |

##### Assumptions – External Infrastructure

Assumptions made in determining the **external infrastructure** inventory. Note specification and quantities taken from project specifications and drawings **(primary data sources)**

| **Component** | **Assumption** |
| --- | --- |
| Cable | 120/XLPE/SWA/LSF/Cu Cabling - modelled as a three conductor cable |
| Ethernet | CAT 5 STP |
| PVC pipe | Class E 15 bar @ 20oC size 3 (2.13 kg/m) - page 28  Class E 15 bar @ 20oC size 1 1/2 (0.67 kg/m) - page 28  http://www.durapipe.co.uk/PDF/6/PVC-U%20Technical%20Brochure%20(Sept10).pdf  Surface, harvested rain water pumped main assumed uPVC (no mention on dwgs.)  Foul water assumed to be PVC. |
| Copper | Gas main duct assumed to include copper pipework.  Type K (3 5/8) - McQuay Refrigerant Piping Design Guide Weight = 5.12 lb/ft (7.62 kg/m) - page 49 |
| Material densities | Reinforced Concrete (normal weight): 2307 kg/m3 (BS 648 - 2% rebar assumed)  MDPE (40 mm): 0.699 kg/m (BS 648 - extrapolation from pipe with 57.2 mm internal diameter, to 40 mm)  MDPE (63 mm): 1.101 kg/m (BS 648 - extrapolation from pipe with 57.2 mm internal diameter, to 63 mm)  HDPE (31 mm): 0.793 kg/m (BS 648 - extrapolation from pipe with 50.8 mm internal diameter, to 31 mm)  HDPE (50 mm): 1.280 kg/m (BS 648 - extrapolation from pipe with 50.8 mm internal diameter, to 50 mm)  HDPE (100 mm): 2.559 kg/m (BS 648 - extrapolation from pipe with 50.8 mm internal diameter, to 100 mm)  HDPE (150 mm): 3.839 kg/m (BS 648 - extrapolation from pipe with 50.8 mm internal diameter, to 150 mm)  HDPE (200 mm): 5.118 kg/m (BS 648 - extrapolation from pipe with 50.8 mm internal diameter, to 200 mm)  (u)PVC (101.6 mm): 2.5 kg/m (BS 648 - Class C PVC assumed, 101.6 mm diameter) |
| Pipes and ducts | 10% included for falls/drops |
| Ducts | 1 No. 100 mm Polyethylene duct (Polypipe Civils Rigiduct) assumed were no other ducts called up on the drawings. |
| Communications | It is assumed that in the second stage of the fit-out the communications cabling is doubled |
| Pipes | 1 pipe per duct - assumed same size as duct (conservative) |
| Ducts | 2 cables per duct (assumed) |

##### Assumptions – PH Infrastructure

Assumptions made in determining the **pipework** inventory.

| **Component** | | **Assumption** |
| --- | --- | --- |
| Plastic pipework | Material | All plastic pipes assumed to be PVC |
|  | Specification | PVC-U Class E (15 bar). Size 2. 60.3 mm diameter http://www.durapipe.co.uk/PDF/6/PVC-U%20Technical%20Brochure%20(Sept10).pdf |
| Steel pipework | Specification | 40ST (t=.28 in)  http://www.pipemarkers.com/pipe-data.php |

Assumed **costs** for the **soil and waste drainage system**

| Component: | Soil and Waste Drainage System | |
| --- | --- | --- |
| Cost: | £122,094 | Spon's M&E 2011, page 127 |
| Average exchange rate 2011: | 1.604 |  |
| 2011 USD: | $122,094 |  |
| Economic Index: | 0.800 |  |
| 2002 USD: | $156,646 |  |
| Replacement every (years): | 20 |  |
| Number of refreshes: | 3 |  |
| Total cost over 60 years, 2002 USD: | $469,938 |  |
| **Cost per kW of IT per year:** | **0.607** | **$/kW/year** |
| System self-weight (kg): | 400 |  |
| Number of refreshes: | 3 |  |
| **Weight per kW of IT per year:** | **0.00155** | **kg/kW/year** |

Assumptions made in determining the **PH infrastructure** inventory.

| **Component** | | **Assumption** |
| --- | --- | --- |
| Packaged GRP sewage pump chamber | Specification | 1200 mm chamber, 2500 mm deep, with duplicate macerator pumps. Comparable to the New Haden Pumps System |
|  | Weight | http://www.flygt.co.uk/131263.asp |
| Pump | Weight | Endincare, Autoflush 30XL |
| Inspection chamber | Weight | 3.5 kg base + assumed 5 kg lid http://www.screwfix.com/p/floplast-d910-5-inlet-inspection-chamber-base-450mm-black/76369 |
| HDPE pipework | Specification | Durapipe Akatherm HDPE, 110 mm outer diameter, 80.7 mm internal diameter |
|  | Volume | (PI()*(0.11/2)^2)-80.7/((10^2)^2)*1 |
| Copper pipework | Specification | 2-1/8 - Copper |
| ABS pipework | Specification | Size 2 class E 217 psig (15 bar) - ABS |
| Pipework | Drops | 10% included to account for drops |
| Soil and waste drainage system | Modelling | The components are combined and modelled as one complete system |
|  | Costing | Spon's M&E 2011, page 127 **(secondary data)** The Approximate Estimating - Elemental Costs have been used to assume a total cost for the Soil and Waste Disposal Installations.  Cost/m2 of technical area = £14/m2.  The technical area is based on 8 No. 1014 m2 data halls; 3 No. 111 m2 Communications rooms; and 3 No. 92 m2 Vendor Access Rooms.  Technical area = 8,721 m2. |
|  | Modelling | Modelled as NAICS sector 333911 - Pump and pumping equipment manufacturing, and in particular '*Pumps, industrial and commercial-type, general purpose, manufacturing*'. |

Assumed **costs** for the **remaining systems** of the **PH infrastructure** inventory

| Component: | Process Water Services | Leak Detection Tracing | Rainwater Harvesting | Domestic Water |
| --- | --- | --- | --- | --- |
| Cost: | £209,304 | £122,094 | £137,257 | £52,326 |
| Year of cost: | 2011 | 2011 | 2011 | 2011 |
| Average exchange rate: | 1.604 | 1.604 | 1.604 | 1.604 |
| USD (year of cost): | $335,765 | $195,863 | $220,188 | $83,941 |
| Economic Index: | 0.800 | 0.800 | 0.800 | 0.800 |
| 2002 USD: | $268,536 | $156,646 | $176,100 | $67,134 |
| Replacement every (years): | 20 | 20 | 20 | 20 |
| Number of refreshes: | 3 | 3 | 3 | 3 |
| Total cost over 60 years, 2002 USD: | $805,608 | $469,938 | $528,301 | $201,402 |
| **Cost per kW of IT per year ($/kW/year):** | **1.041** | **0.607** | **0.683** | **0.260** |
| System self-weight (kg): | 93,992 | 373 | 22,114 | 3,488 |
| Number of refreshes: | 3 | 3 | 3 | 3 |
| **Weight per kW of IT per year (kg/kW/year):** | **0.364** | **0.00145** | **0.0857** | **0.0135** |

Assumptions made in determining the **remaining systems** of the **PH infrastructure** inventory.

| **Component** | | **Assumption** |
| --- | --- | --- |
| Leak detection tracing | Costing | Spon's M&E 2011, data centre example costing, page 128. The *Approximate Estimating - Elemental Costs* have been used to assume a total cost for the leak detection system.  Cost/m2 technical area = £14/m2.  Technical area = 8,721 m2 (8 No. 1014 m2 data halls; 3 No. 111 m2 Communications rooms; and 3 No. 92 m2 Vendor Access Rooms). |
|  | Weights | Control panel - weight for Vimpex K200000 - weight for aqualarm could not be found.  Point of use detector (STDi-24) - weight assumed from dimensions.  Cable detection modules (CDBi-24) - weight assumed from dimensions.  Sensing cable (CD-5) - http://www.etracetek.com/Documents/tt1000.pdf |
|  | Omissions | Warning labels and floor clips omitted because they provide a small contribution to the overall mass. |
|  | Modelling | Modelled as NAICS sector 334518/9 - Watch, clock and other measuring and controlling device manufacturing, and in particular '*Gas/Water Leak Detection Manufacturing*'. |
| Domestic water | Costing | Spon's M&E 2011 data centre example costing used - page 127. The Approximate Estimating - Elemental Costs has been used to assume a total cost for the domestic water system Cost/m2 technical area = £6/m2.  The hot and cold water services in Spon's include the process water services. The overall cost given is £23.50 per m2 of technical space. The domestic water installation is only a very small part of this and so 20% of the cost has been assumed with the remaining 80% accounting for the process water services. The cost per m2 has also nominally been increased to £30/m2 to account for the solar panels and use of reverse osmosis with the RWH system to ensure pure water for the humidifiers of the studied facility.  Technical area = 8,721 m2 (8 No. 1014 m2 data halls; 3 No. 111 m2 Communications rooms; and 3 No. 92m2 Vendor Access Rooms). |
|  | Materials | When establishing costs all fixtures were assumed to be plastic, but could also be vitreous china or metal |
|  | Weights | **Wash basins** - Ivo 550 mm Basin & Full Pedestal - 1 Taphole (Plumbworld).  **Toilets** - Ivo Close Coupled Toilet WC (Plumbworld). **Expansion vessel and valves** (80 L and 25 L) - assumed same as CNDW.  **Pressurisation unit** - MP41 (middle size assumed) - http://www.aquatechpressmain.co.uk/Uploads/DS211Mp41Issue4150dpi.pdf  **Unvented HWS cylinders** - Gledhill Stainless Lite Direct Stainless Steel Unvented Hot Water Cylinder (PlumbNation).  **Scale inhibitor unit** - assumed 200 mm pipe dia. - JS-800 (Suprion) - http://www.aquaflow.co.uk/gfx/media/home/suprion/SUPRION-catalogue2010.pdf  **HWS Circulator** - heaviest Groundflos assumed. http://www.plumbnation.co.uk/site/grundfos-ups40-80fb-hot-water-service-circulator-flanged/grundfos-hot-water-services-catalogue.pdf  **Air separator** - Armstrong - Flexair 100 F. Assumed same as mechanical air and dirt separator.  **Solar panels** - Andrews glazed flat plate SOL 250H. http://www.andrewswaterheaters.co.uk/products_details.php?product=SOLARflo  **Waterless trap** - Hepv0. Weight assumed. **Gas meter** - weight assumed.  **Valves -** same as mechanical infrastructure valves.  **Pumps** - Wilo Ltd ST/7 solar pump.  **Tundish/strainer/temperature gauges/drain cocks** - same as mechanical infrastructure. |
|  | Modelling | Modelled as NAICS sector 333414 - Heating equipment (except warm air furnaces) manufacturing, and in particular 'Heating equipment, hot water (except hot water heaters), manufacturing ' and 'Solar heating systems manufacturing'. |
| Process water services | Costing | Spon's M&E 2011, data centre example costing, page 127 The *Approximate Estimating - Elemental Costs* for *hot and cold water services* has been used to assume a total cost for the process water services.  Cost/m2 technical area = £24/m2 (See comments in DW costing)  Technical area = 8,721 m2 (8 No. 1014 m2 data halls; 3 No. 111 m2 Communications rooms; and 3 No. 92m2 Vendor Access Rooms). |
|  | Weights | Back inlet gully, inspection chamber, drains, reverse osmosis unit, leak detection probes and all tanks - assumed weights.  Booster pump sets, water softening plant, strainers, UV treatment (heaviest assumed) and humidifier control taken from technical specifications.  Valves, tundish, meters - as for those in the mechanical infrastructure.  Hydraulic accumulators (25 L) - http://www.fchdirect.co.uk/bladder-accumulator-20-ltr-310-bar-nitrile-ce#tabs-information-2  Gauge weight assumed the same as meters.  Meter assumed the same as valves.  Hydraulic accumulator (500 L) - www.hydac.ro/resurse/Acumulatori.pdf (extrapolation from a 200 L tank)  Pump set weights include valve, pumps, strainers and accumulators.  Any overflows assumed part of the tank weights. |
|  | Humidifier manifolds | Assumed part of the mechanical infrastructure. Controls assumed part of the process water services. |
|  | Pipes | Assumed 1-1/4 size steel pipe (40ST) |
|  | Modelling | Modelled as NAICS sector 333319 - Other commercial and service industry machinery manufacturing, and in particular 'Water treatment equipment manufacturing'. |
| Rainwater harvesting (tanks, sumps, pumps) | Costing | Spon's M&E 2011, page 9 Part 1 of Spon's M&E - Engineering Features - includes a detailed look at Rainwater Harvesting. This has been used alongside prices from the Approximate Estimating - Elemental Costs section (for the data centre example costs) to piece together a price for the system as a whole. Indicative costs are given based on an office in Leeds with a 2000 m2 roof area and an underground collection tank of 25,000 litres. Though the roof area of the data centre (27,040 m2) is far greater than the 2000 m2 above, the underground tank size is similar (40,000 litres). Any tank cost is therefore apportioned according to the tank size and any other installations on the roof size.  System tanks and filters and controls - Unit Cost = £18,000 (additional 75% added to account for the stormwater attenuation tank).  Mains water back-up and distribution pump arrangement = £4,000 Connections to drainage - Unit Cost = £1,000 Nb. It is assumed that the drainage itself - syphonic outlets and drainpipes are not included in the above costs. This is therefore taken from Approximate Estimating - Elemental Costs for Disposal Installations - Rainwater. This would include all drainpipes which are already accounted for in the pipework modelling. The Cost/m2 is therefore applied for gutters and syphonic outlets. As these are specialist pieces of kit, it is assumed that 75% of the cost/m2 covers these parts of the system. Disposal Installations - Rainwater - Unit Cost = £7.13/m2 of technical area (8,721 m2). |
|  | Weights | **Tank** - Condor 40,000 L - class 2 shell (MAX 2.5-40000, although actually CHT 2.5-40000)  http://www.conderproducts.com/home/default.aspx?id=1217&catId=1428&itemID=1503  **Sumps** - assumed the same as pumps.  **Pumps** - taken from the technical specification. **Valves** - as for those in the mechanical infrastructure.  **Silt collection storage, float controls, control panel, syphonic rain water outlet (assumed steel), rainwater and weir overflows, syphonic breaks** - all assumed weights  **Gutters** - assumed 2 kg/m **Storm water attenuator tank** - 2 layers, 520 mm deep each, assume 36m x 12 m on plan (estimate)  http://www.hydro-international.biz/stormwater/stormcell_performance.php |
|  | Pump chamber | Assumed all concrete (brickwork ignored). Ring shaft ignored. Area on plan: ((2*4.05*0.35)+(3*2.1*0.35))*4.25 |
|  | Stormwater attenuator tank | Assumed online, two layers, gravel, air vent pipe, geotextile, 2 layers of stormcell, diffusion layer, perforated distribution pipes, impermeable membrane.  http://www.hydro-international.biz/restricted/download.php  Each stormcell is 2400 x 1200 x 120-520 mm deep |
|  | Modelling | Modelled as NAICS sector 332420 - Metal tank (heavy gauge) manufacturing, and in particular 'Water tanks, heavy gauge metal manufacturing'. |
| RWH Reinforced Concrete | Concrete | Reinforced Concrete (normal weight): 2400 kg/m3 (BS 648 - 2% rebar assumed).  Tank assumed rectangular for calculation of surrounding concrete (Dia.=2500; concrete = 300 beyond; length = 8500 mm) |
|  | Steel | Assumed 2% of the reinforced concrete weight. |
| RWH Pipework | Material | Drainpipes all assumed 160 mm diameter (internal) and 171.1 mm external diameter.  250 mm (internal diameter) collection mains have a 432 mm external diameter. HDPE assumed. 945 kg/m3. Assumed 13.5 m vertical drainpipes without any bends.  Collection mains include a 3 m length from the outlet to the mains. http://www.durapipe.co.uk/PDF/15/Akatherm%20Technical%20Brochure%20(Oct%2008).pdf |
| RWH Steel Accessories | Material | Hanging system assumed steel. |
|  | Drip trays and support | Assumed 10 mm thick. Continuous rail from which hanging rods are attached is assumed 30mm diameter.  1500 mm centres, 2 per location, 3 valleys (continuous rails) M10 Hanging rods: 1500mm centres, 4 per location, 3 valleys (hanging rods)  Longest length of hanger assumed (M10 = 10 mm dia) |

##### Assumptions – IT Infrastructure

**Assumptions** made in determining the components of the **IT infrastructure** inventory.

| **Component** | | **Assumption** |
| --- | --- | --- |
| Racks | Number | Based on the total (peak) load per hall (2.3 MW) and load per rack (5 kW/rack) without exceeding the load/m2  (2268 W/m2). Number of racks = (load per hall)/(load per rack) |
|  | Self-weight | Assumed. HP 10642 G2 Rack (42U rack, height (m) = 42 x 25.4/1000) http://h18000.www1.hp.com/products/quickspecs/12402_div/12402_div.HTML#Technical Specifications (rack depth: 1m, rack width: 0.6m, rack height: 1m) |
|  | Modelling | Modelled as the chassis of a network mains device to reflect the power components in a rack and factored up (Ecoinvent process - Chassis, network main devices). Assumed the disposal included in the process refers to waste produce during the manufacturing stage. |
| Load/room | Data halls | Taken from design drawings 2.3 MW/room |
|  | Vendor access rooms | Taken from design drawings  209 kW/room |
|  | Communications rooms | Taken from design drawings  252 kW/room |
| Cabling | Length | It was assumed that the length of cable per rack = the total of the rack height and length of room. |
|  | Self-weight | Taken from the Ecoinvent process used to model the component (Cable, network cable, category 5, without plugs, at plant/GLO U). Self-weight = 0.036 kg/m. |
| ICT | Mix | Rack allocation based on data from Koomey, 2011, Growth in data center electricity use 2005 to 2010 (see Table 2 from Koomey, 2011 below). Assumed allocation per rack - servers (70%, 3.5 kW/rack, 10 No. U), storage (20%, 1 kW/rack, 2.9 No. U), networking (10%, 0.5 kW/rack, 1.4 No. U). |
| IT Power | Utilisation | 30% utilisation assumed from Fujitsu White Paper - Life Cycle Assessment and Product Carbon. Footprint Primergy TX 300 S5 and PRIMERGY RX 300 S5 Server (Fujitsu, 2010) (Barroso, 2009) (Koomey, 2007). |
|  | Idle power | 50% assumed (Ramakrishnan, 2012) |
|  | Rack density | 5 kW/rack assumed  Average in the UK was found to be 4.22 kW/rack, but conservatively and for modelling, 5kW/rack assumed. DCD Focus, Volume 3, Issue 18, October/November 2011, page 86 (part of The 2011 Census, Energy and Monitoring six page special). |
|  | Power | The number of servers, storage and networking equipment populating the halls was based on the peak power  (350 W per U) however; an actual power (228 W per U) was used for their power utilisation. |
|  | U | 1U is assumed to be 350 W (peak power) Each component is 1U |
| Storage | Weight | The self-weight was based on the Ecoinvent process used to model the storage (HDD, desktop computer, at plant/GLO U) which gave a self-weight of 0.575 kg. As this is a desktop HDD, the self-weight was doubled to reflect storage in the data centre environment. |
| Networking | Weight | It was assumed that the self-weight was the same as the storage self-weight. |
|  | Modelling | Ecoinvent process - Router, IP network, at server. |
| Servers | Weight | The self-weight was based on the Ecoinvent process used to model the servers which gave a self-weight of 11.3 kg. |
|  | Modelling | Modelled as a computer without a screen (Ecoinvent process: Desktop without screen, at plant). Eventual disposal of the computer removed as it is included in the end-of-life modelling. |
| Containment | Weight | The containment (cold aisle containment) is assumed to provide doors at either end of an aisle, a roof over the racks (assumed to cover the 1.2 m space between facing racks and the depth of two racks (2 x 1 m) and a third of the height of the racks (0.33 m).  It was estimated that the containment would therefore be a percentage of the weight of the racks.  Assuming the containment is made of steel plate, a third of the rack weight was taken. |

Total electricity used by data centers worldwide (2000, 2005, and 2010) (Koomey, 2011, Table 2)

|  |  |  |  | **IDC adj.** | |  |  |  |  |
| --- | --- | --- | --- | --- | --- | --- | --- | --- | --- |
|  |  |  |  | **Upper Bound** | **Lower Bound** |  |  |  |  |
| **Equipment** | **Units** | **2000** | **2005** | **2000-2005 growth** | **No growth** |  |  |  |  |
| **2010 (Case A)** | **2010 (Case B)** |  |  |  |  |
| Volume servers | BkWh | 19.7 | 50.5 | 81.5 | 67.2 |  |  |  |  |
| Mid-range servers | BkWh | 6.7 | 6.7 | 7.3 | 5.1 |  | **Component** | **Case A** | **Case B** |
| High-end servers | BkWh | 2.8 | 4.2 | 13 | 7.8 |  | % Servers: | 71.9 | 71.8 |
| Storage | BkWh | 2.8 | 7.5 | 24.2 | 19.1 |  | % Storage: | 17.1 | 17.1 |
| Communications | BkWh | 3.4 | 7.3 | 15.6 | 12.3 |  | % Networking: | 11.0 | 11.0 |

##### Assumptions – Mechanical Infrastructure

Assumed **costs** for the **mechanical infrastructure** inventory

| Component: | Battery Cooling | Chilled Water System | Condenser Water System | Free Cooling |
| --- | --- | --- | --- | --- |
| Cost: | £58,685 | 1801155.4 | £696,017 | £20,012,000 |
| Year of cost: | 2011 | 2008 | 2011 | 2009 |
| Average exchange rate: | 1.604 | 1.856 | 1.604 | 1.565 |
| USD (year of cost): | $94,143 | $3,342,089 | $1,116,551 | $31,317,279 |
| Economic Index: | 0.800 | 0.836 | 0.800 | 0.839 |
| 2002 USD: | $75,293 | $2,792,538 | $892,987 | $26,261,104 |
| Replacement every (years): | 20 | 20 | 20 | 20 |
| Number of refreshes: | 3 | 3 | 3 | 3 |
| Total cost over 60 years, 2002 USD: | $225,879 | $8,377,613 | $2,678,960 | $78,783,313 |
| **Cost per kW of IT per year ($/kW/year):** | **0.292** | **10.827963** | **3.46** | **102** |
| **90% for producer price ($/kW/year):** | **0.263** | **9.75** | **3.12** | **91.6** |
| System self-weight (kg): | 1,980 | 220,499 | 24,082 | 1,249,707 |
| Number of refreshes: | 3 | 3 | 3 | 3 |
| **Weight per kW of IT per year (kg/kW/year):** | **0.00768** | **0.855** | **0.0934** | **4.85** |

Assumed **costs** for the **mechanical infrastructure** inventory

| Component: | Motorised Control Dampers | Pressurisation | Radiant Heaters | Ventilation |
| --- | --- | --- | --- | --- |
| Cost: | £124,686 | £21,000 | £26,011 | £130,282 |
| Year of cost: | 2011 | 2011 | 2011 | 2011 |
| Average exchange rate: | 1.604 | 1.604 | 1.604 | 1.604 |
| USD (year of cost): | $200,021 | $33,688 | $41,727 | $208,998 |
| Economic Index: | 0.800 | 0.800 | 0.800 | 0.800 |
| 2002 USD: | $159,971 | $26,943 | $33,372 | $167,151 |
| Replacement every (years): | 20 | 20 | 20 | 20 |
| Number of refreshes: | 3 | 3 | 3 | 3 |
| Total cost over 60 years, 2002 USD: | $479,914 | $80,829 | $100,117 | $501,454 |
| **Cost per kW of IT per year ($/kW/year):** | **0.620** | **0.104** | **0.129** | **0.648** |
| **90% for producer price ($/kW/year):** | **0.558** | **0.0940** | **0.116** | **0.583** |
| System self-weight (kg): | 6,927 | 204 | 8.8 | 50,621 |
| Number of refreshes: | 3 | 3 | 3 | 3 |
| **Weight per kW of IT per year (kg/kW/year):** | **0.0269** | **0.000790** | **0.00106** | **0.196** |

Assumed **pipe sizes** and **specifications** for each material type

| **Material** | **Average diameter (mm)** | **Assumed diameter (mm)** | **Self-weight (kg/m)** | **Specification** | |
| --- | --- | --- | --- | --- | --- |
| Copper | 46 | 54 | 3.07 | Type K (2 1/8) | McQuay refrigerant piping design guide |
| Steel | 136 | 168 | 28.2 | 40ST (t=.28 in) | http://www.pipemarkers.com/pipe-data.php |
| ABS | 90 | 114 | 3.59 | ABS Class E | http://www.durapipe.co.uk/PDF/1/ABS%20technical%20(March%202010).pdf |
| PVC | 38 | 60 | 1.00 | PVC-U Class E 15 bar | http://www.durapipe.co.uk/PDF/6/PVC-U%20Technical%20Brochure%20(Sept10).pdf |
| MDPE | 85 | 90 | 2.98 | Wefatherm Fiber-pipe SDR 7.4 | Technical submittal 90 x 12.3 mm |

**Assumptions** made in determining the components of the **mechanical infrastructure** inventory.

| **Component** | | **Assumption** |
| --- | --- | --- |
| Motorised control dampers | Costing | Spon's M&E 2011 has manually controlled volume control dampers, but no motorised control dampers (i.e. with actuators). Some are fire rated and so the following piece of kit has been assumed for the 248 MCD plus individual damper actuators:  Smoke/fire damper; galvanised steel casing; stainless steel folding shutter; fusible link and 24 V d.c. electro-magnetic shutter release mechanism; spring operated; BS 476 4 hour fire-rating  Spon's M&E 2011, page 491 Net price used - industry tender price, plus nominal allowance for fixings, waste and applicable trade discounts. |
|  | Specification | As above. Assumed size = 800 mm x 800 mm (sum of two sides = 1600 mm) |
|  | Quantity | UPS room dampers taken from the specification for the AHU and relevant drawings. |
|  | Weight | Taken from technical submittal - assumed the weight of a 1000 mm x 1000 mm damper (only value) |
| Actuators | Specification | Damper Actuator with auxiliary switches, assumed from Spon's M&E 2011 |
|  | Costing | Net price from Spon's M&E 2011, page 688 |
|  | Quantity | Taken from technical submittals (UPS rooms). Plant room actuators assumed the same as the number of dampers. |
|  | Weight | Taken from a technical submittal |
|  | Modelling | Modelled as NAICS sector 334512 - Automatic environmental control manufacturing, and in particular 'Damper operators manufacturing'. |
| Chilled water system | Weight | **Dirt separators:** Zeparo ZIK 300F (from technical submittal) |
|  |  | **Pump enclosures:** Technical submittal. Assumes 12 fixings (valves, strainers, gauges) of 5 kg each and pump enclosure – 6 mm thick steel, 4085 x 2100 x 2000 mm. Steel self-weight = 7850 kg/m3 (galvanised steel) from BS 648 |
|  |  | **Chillers:** York Chillers - YCIV-SE-LS 1500 (large) and York Chillers - YCIV-SE-LS 0770 (small) Operation weight + refrigerant charge assumed.  12 No. large chillers and 2 No. small chillers |
|  |  | **Pumps:** 37 kW @ 3000 rpm (Armstrong Pumps) - comparable to specification set out in the technical submittal http://www.armstrongpumps.com/Data/submitaldatas/Links/02_01_003/43.535UK_4300_50Hz_150-250A%286x6x10%29_Submittal.pdf |
|  |  | **Pressurisation unit:** Taken from technical submittal Per unit - 1 No. dosing pot (26 kg), 2 No. controls (43 kg), 2 No. expansion vessels (163 kg),  2 No. buffer vessels (16 kg).  Boss Dosing Pots (25 litres), Transfero TPV8.1 Controls, SD80.10 Pump Buffer Vessels |
|  |  | **Valves:** VVF31.80-100 Valve - from technical submittal |
|  |  | **Meters, drain cocks, gauges:** Assumed the same weight as valves |
|  |  | **Trace heating:** Estimated |
|  |  | **Strainers:** From the technical submittal - the largest one assumed |
|  | Costing | Costs were a mix of 2008 and 2011 values.  As the biggest cost came from 2008 this was assumed for all costs. |
|  |  | **Dirt separators:** Spon's M&E 2011, page 345, net price Actual in-line dirt separator has a nominal bore of connecting pipework of 450 mm (Mechanical Specification) but the table only gives up to 300mm therefore this was assumed. |
|  |  | **Chillers:** Taken from the technical submittal |
|  |  | **Pumps:** All pumps and enclosures were combined to achieve a costing for 16 pumps. Spon's M&E 2011, page 347, net price Centrifugal heating and chilled water pump, belt drive, 100 mm pump size; 36 l/s at 550 kPa max head, 30 kW max motor rating (comparable to that specified) |
|  |  | **Pressurisation unit:** Spon's M&E 2011, page 411, net price Chilled water content including appliances = 64,312 litres, therefore 65,000 litres assumed the 'system volume'.  (Pressurisation units = 916 litres per unit = 1,832 litres total).  Final working pressure of 4 bar a 3m static head and system operating temperatures of 6oC/12oC.  Cost extrapolated from costs for units ranging from 1,800 litres to 27,000 litres. |
|  |  | **Valves:** Spon's M&E 2011, page 334, net price.  Assumed all are control valves, electrically operated: Cast iron; butterfly type; two position electrically controlled 240V motor and linkage mechanism; for low pressure hot water; maximum pressure 6 bar at 120oC; flanged ends.  150 mm diameter |
|  |  | **Meters:** Spon's M&E 2011, page 345, net price.  All assumed to be energy meters, although half are compact orifice flow meters and half are energy meters.  Electromagnetic valves – 200 mm |
|  |  | **Drain cocks:** Spon's M&E 2011, page 251, net price.  All assumed to be DZR Combined stop/drain cocks, compression joints to copper (to account for the cost of some drain cocks being bigger, compression joints have been assumed) 22 mm drain cocks |
|  |  | **Trace heating:** Spon's M&E 2011, page 410, net price.  Consists of: trace heating, 150 mm, helically wound cable; single capillary thermostat, 150 x 150 x 75 mm; and Connection junction box, 150 x 150 x 75 mm |
|  |  | **Gauges**: Spon's M&E 2011, page 344, net price.  Dial pressure/altitude gauge; bronze bourdon tube type; coated steel case and dial; glass window BS1780; screwed end. Pressure gauges – 150 mm |
|  |  | **Strainers**: Spon's M&E 2011, page 340, net price.  All strainers conservatively assumed to be 200 mm dia, Hattersley fig 810 cast iron 'Y' type (from technical submittal)  Cast iron strainer; Y type; PN16; working pressure 16 bar from -10oC to 120oC; BS 4504 flanged ends. |
|  | Modelling | Modelled as NAICS sector 333415 - Air conditioning, refrigeration, and warm air heating equipment manufacturing, and in particular 'Air-conditioning equipment (except motor vehicle) manufacturing '. |
| Condenser water system | Weight | **Dry cooler:** 1 No. External free-blow with 8 fans and 1 No. Internal ducted with 8 fans. Weight taken from the technical submittal |
|  |  | **Test point:** Assumed same as chilled water strainer |
|  |  | **Valves, drain cocks, gauges, motorised control valves, MCW and MS:** Assumed same as chilled water valve |
|  |  | **Pumps:** Assumed same as chilled water valve |
|  |  | **Strainers:** Assumed same as chilled water strainers |
|  |  | **Tundish:** Assumed same as chilled water strainers |
|  |  | **Chemical dosing pots:** Assumed same as chilled water dosing pots |
|  |  | **Fill points:** Assumed same as chilled water strainers |
|  |  | **Pressurisation units:** Taken from the technical submittal. Weight assumed the same as the expansion vessel (with water make-up) |
|  |  | **Air and dirt separators:** Assumed Flexair 100 F http://www.flamco.co.uk/flamco_uk/en/our_products/venting_equipment.ContentPar.21543.File.tmp/doc.eng.va.07.v061209.pdf |
|  |  | **Stulz CRAC units:** Two weights given in the technical submittal - an average of the two values assumed. |
|  | Costing | **Dry cooler:** Spon's M&E 2011, page 402, net price.Dry air cooler; selection based on fluid temperatures 45oC on, 40oC off at 32oC dry bulb ambient temperatures; includes 20% ethylene glycol; includes placing in position; electrical work elsewhere. N.B. 1 of the dry coolers is 100% water and vertical; the other 2 are 25% glycol, flat bed. All are assumed flat bed (as above). From Mechanical Services Specification.  Heat rejection (capacity) = 359.5 kW, for tables assume 500 kW, no inverter. |
|  |  | **Valves, test points, tundish, fill points, motorised control valves, MCW and MS:** All modelled as valves. Spon's M&E 2011, page 334, net price.  Assume all are control valves, electrically operated: Cast iron; butterfly type; two position electrically controlled 240 V motor and linkage mechanism; for low pressure hot water; maximum pressure 6 bar at 120oC; flanged ends. Control valve 150 mm. |
|  |  | **Drain cocks:** Spon's M&E 2011, page 251, net price. All assumed to be DZR Combined sop/drain cocks, compression joints to copper (to account for the cost of some drain cocks being bigger, compression joints have been assumed).  22 mm Drain Cocks |
|  |  | **Pumps:** Spon's M&E 2011, page 347, net price Centrifugal heating and chilled water pump, belt drive, 100 mm pump size; 36 l/s at 550 kPa max head, 30 kW max motor rating (comparable to that specified) |
|  |  | **Gauges**: Spon's M&E 2011, page 344, net price.  Dial pressure/altitude gauge; bronze bourdon tube type; coated steel case and dial; glass window BS1780;  screwed end. Pressure gauges – 150 mm |
|  |  | **Strainers**: Spon's M&E 2011, page 340, net price.  All strainers conservatively assumed to be 200 mm dia., Hattersley fig 810 cast iron 'Y' type (from technical submittal)  Cast iron strainer; Y type; PN16; working pressure 16 bar from -10oC to 120oC; BS 4504 flanged ends. |
|  |  | **Chemical dosing pots:** Capacity unknown and SPON's gives no value, therefore price from Accepta 2011 Catalogue used:  http://www.accepta.com/dosing-pumps-control-equipment/accepta-dosing-pumps-control-equipment-catalogue.pdf  15 litres capacity, page 13 |
|  |  | **Pressurisation units:** Spon's M&E 2011, page 411, net price. System volume = 3000 litres (from the mechanical specification) - Assume same price as 4500 litres. |
|  |  | **Air and dirt separators:** Spon's M&E 2011, page 346, net price.  In-line combined microbubble deaerator and dirt separator (from mechanical specification, page 18 of 23); nominal bore of connecting pipework of 100 mm with flow rate of 14L/s (50.4m3/hr). Air and Dirt Separators, 100 mm, 49 m3/h. |
|  |  | **Stulz CRAC units:** Spon's M&E 2011, page 127, elemental cost based on data centre example.  Taken from the 'Approximate Estimating - Elemental Costs' section. Freestanding cooling units with redundancy of N+20% to technical areas. Based on single coil cooling units, 30% of units with humidification. Facility under consideration has 25% of units with humidification and two coils - chilled water and condenser water coils - therefore add 10% to price for additional coil. Cost/m2 (£366/m2) x technical floor area (1,218 m2 - 3 No. Vendor Access Rooms (and UPS rooms) – 92 m2;  3 No. Communications rooms (and UPS rooms) – 111 m2. |
|  | Modelling | Modelled as NAICS sector 333415 - Air conditioning, refrigeration, and warm air heating equipment manufacturing, and in particular 'Air-conditioning equipment (except motor vehicle) manufacturing '. |
| Ventilation | Weight | **Dampers, actuators:** Modelled as motorised control dampers. |
|  |  | **Attenuators:** Assumed same as free cooling |
|  |  | **Fans:** Assumed all the same as UPS to battery room fans |
|  |  | **Grilles:** Assumed the same as floor grilles taken from structural components spreadsheet - 38.21 kg/m2.  Assumed to be 600 mm x 600 mm (average of those in the facility) |
|  |  | **Supply and extract AHUs:** Taken from the technical submittal for the generator room AHU |
|  | Costing | **Dampers:** Assume motorised as above, therefore include 1 actuator per 2 dampers.  Spon's has manually controlled volume control dampers, but no motorised control dampers (i.e. with actuators). Some are fire rated and so the following piece of kit has been assumed plus individual damper actuators:  Smoke/fire damper; galvanised steel casing; stainless steel folding shutter; fusible link and 24 V d.c. electro-magnetic shutter release mechanism; spring operated; BS 476 4 hour fire-rating.:  Assumed size = 800 mm x 800 mm (sum of two sides = 1600 mm)  Pressurisation Units: Spon's M&E 2011, page 491, net price. |
|  |  | **Actuators:** Spon's M&E 2011, page 688, net price.  Damper Actuator with auxiliary switches |
|  |  | **Attenuators:** Spon's M&E 2011, page 510, net price.  An average ductwork size of 450 x 400 has been assumed from inspection of the ductwork takedown, therefore to fit with data in Spon's table a duct of 500 x 500 mm has been assumed. No technical specification can be found for the ventilation attenuators and so a length of 1800 mm has been assumed:  Attenuator, rectangular ducts. |
|  |  | **Fans:** Spon's M&E 2011, page 505, net price.  Assumed in-line bifurcated fans (from technical submittal), required duty of 390 l/s @ 135 Pa (Static) therefore following assumed: Bifurcated fan; suitable for temperature up to 200oC with motor protection to IP55; including ancillaries, anti-vibration mountings, mounting feet, matching flanges, flexible connectors and clips; 415 V, 3 phase, 50 Hz motor; includes fixing in position; electrical work elsewhere. Fan, 400 mm; 1.97 m3/s @ 200Pa |
|  |  | **Grilles:** Spon's M&E 2011, page 493, net priceAssume all supply grilles of 400 mm x 300 mm (mechanical specification) Grilles, supply, rectangular, 400 mm x 300 mm |
|  |  | **Supply and extract AHUs: A**pproximate estimating (all-in-rates). Flow rate of 1.38 m3/s assumed from technical submittal. The rates give a spread of £6000 - £8000/m3/s. This rate includes sound attenuation and dampers which have already been accounted for and LPHW pre-heater which is not included and so an average value of £7000/m3/s is assumed. |
|  | Modelling | Modelled as NAICS sector 333415 - Air conditioning, refrigeration, and warm air heating equipment manufacturing. |
| Battery cooling | Specification | Mitsubishi units - PKA-RP60FAL (indoor); PUHZ-RP50VHA3 (outdoor)  5 kW Nominal cooling capacity and 4.5 kW UK Cooling capacity (from technical submittal) |
|  | Weight | **DX Indoor units:** taken from the technical submittal |
|  |  | **DX Outdoor units:** taken from the technical submittal |
|  |  | **Condenser fans:** assumed the same as the outdoor units |
|  | Costing | Spon's M&E 2011, page 415, net price 6 of the Indoor DX Units have outdoor condenser fans rather than outdoor DX units, however, for the purpose of modelling all 30 indoor DX units are assumed to have outdoor DX units. Ceiling mounted 4 way blow cassette heat pump unit with remote fan speed and load control; refrigerant 470oC; includes outdoor unit. Nominal cooling/heating capacity assumed (shown above), nominal cooling capacity = 6 kW and nominal heating capacity = 7 kW:  Split System, Cooling 7.1 kW, heating 8.2 kW |
|  | Modelling | Modelled as NAICS sector 333415 - Air conditioning, refrigeration, and warm air heating equipment manufacturing, and in particular ' Room air-conditioners manufacturing'. |
| Pressurisation | Specification | Nuaire, Squrbo units, ESS6-E centrifugal fans, electric heaters, air filters, SIL-400 silencers |
|  | Weight | Weights for separate components taken from technical submittal manufacturer specifications. |
|  | Costing | **Supply AHU:** Spon's M&E 2011, page 415, approximate estimating (all-in-rates). System considered as a whole Flow rate of 1.38 m3/s assumed from technical submittal. The rates give a spread of £6000 - £8000/m3/s. This rate includes sound attenuation and dampers which have already been accounted for and LPHW pre-heater which is not included and so an average value of £7000/m3/s is assumed. |
|  | Modelling | Modelled as NAICS sector 333415 - Air conditioning, refrigeration, and warm air heating equipment manufacturing, and in particular 'Air-conditioning equipment (except motor vehicle) manufacturing'. |
| Radiant heaters | Specification | All heaters have a 1200 W output |
| Location | Water storage tank room, sprinkler tank room, storage room, dry cooler plant rooms. |
| Weight | Assumed heat output of 1700 W. Weight taken from technical submittal - Elztrip EZ 217 1700w ceiling (3-10 m) mounted radiant heater.  http://www.puravent.co.uk/products/display.pl?sector=6&sectorname=heat&category=62&subcategory=421&product_details=8933&param=421 |
|  | Costing | Spon's M&E 2011, page 356, net price Ceiling mounted fan convector, 1195 mm long, 2 row 9.27 kW, 250 l/sec:  Radiant heaters, ceiling mounted fan convector |
|  | Modelling | Modelled as NAICS sector 333414 - Heating equipment (except warm air furnaces) manufacturing, and in particular 'Heaters, space (except portable electric), manufacturing'. |
| Ductwork and insulation | Material | Galvanised steel (ductwork).  Mineral wool insulation  (http://www.feta.co.uk/adcas/downloads/BG-10-2010%20Structural%20Fixings%20for%20Ductwork%20Systems.pdf ) |
|  | Specification | All ductwork is assumed the same. Fire board is omitted. |
|  | Size | All ductwork is the same size: 450 mm x 400 mm (average of the ductwork sizes). |
|  | Weight | Self-weight of 450 mm x 400 mm ductwork with 30 mm insulation = 17.7 kg/m (from ADCAS website).  Self-weight of insulation = 134 kg/m3 (BS 648:1964 - 3.4 kg/m2/inch).  Volume of insulation = ((2*(0.03*(0.45+0.06)))+2*(0.03*0.4)).  Therefore: Self-weight of insulation = 7.31 kg/m Self-weight of ductwork = 10.39 kg/m |
|  | Height | Any vertical lengths in the ductwork (i.e. between floors) are assumed to be 4 m. |
| Pipework | Lengths | Refrigerant zones assumed to contain 2 pipes. |
|  | Sizes | Refrigerant pipes 22 mm diameter.  Average diameters taken for each pipe material - see pipework table. |
|  | Insulation | Specification: Phenolic foam insulation was actually used on pipework. Modelled as mineral wool insulation in SimaPro. 25 mm thick insulation to copper and steel pipework assumed.  134 kg/m3 used for mineral wool insulation (MWI) (BS 648:1964 - 3.4 kg/m2/inch) Therefore based on assumed diameters:  MWI (copper) = 0.831 kg/m MWI (steel) = 2.03 kg/m |
|  | Plastic | Plastic pipe weights combined and modelled as PVC |

##### Assumptions – Electrical Infrastructure

Assumed **costs** for the **electrical** i**nfrastructure** inventory

| **Component:** | **BMS** | **Bulk Fuel Tanks** | **Bulk Fuel Transfer Pumps** | **CCTV** |
| --- | --- | --- | --- | --- |
| Cost: | £2,877,135 | £168,620 | £14,502 | £1,391,000 |
| Year of cost: | 2009 | 2011 | 2011 | 2011 |
| Average exchange rate: | 1.565 | 1.604 | 1.604 | 1.604 |
| USD (year of cost): | $4,502,500 | $270,500 | $23,264 | $2,231,441 |
| Economic Index: | 0.839 | 0.800 | 0.800 | 0.800 |
| 2002 USD: | $3,775,571 | $216,338 | $18,606 | $1,784,645 |
| Replacement every (years): | 20 | 20 | 20 | 20 |
| Number of refreshes: | 3 | 3 | 3 | 3 |
| Total cost over 60 years, 2002 USD: | $11,326,714 | $649,014 | $55,817 | $5,353,936 |
| **Cost per kW of IT per year ($/kW/year):** | **14.6** | **0.839** | **0.0721** | **6.92** |
| **90% for producer price ($/kW/year):** | **13.2** | **0.755** | **0.0649** | **6.23** |
| System self-weight (kg): | 84,834 | 1,280,000 | 88 | 61.2 |
| Number of refreshes: | 3 | 3 | 3 | 3 |
| **Weight per kW of IT per year (kg/kW/year):** | **0.329** | **4.96** | **0.000341217** | **0.000237** |

| **Component:** | **Distribution Boards** | **Freight Lifts** | **Gas Detection** | **Gen Sets** |
| --- | --- | --- | --- | --- |
| Cost: | £189,064 | £255,424 | £10,000 | £5,992,031 |
| Year of cost: | 2011 | 2009 | 2011 | 2011 |
| Average exchange rate: | 1.604 | 1.565 | 1.604 | 1.604 |
| USD (year of cost): | $303,296 | $399,719 | $16,042 | $9,612,416 |
| Economic Index: | 0.800 | 0.839 | 0.800 | 0.800 |
| 2002 USD: | $242,568 | $335,185 | $12,830 | $7,687,745 |
| Replacement every (years): | 20 | 20 | 20 | 20 |
| Number of refreshes: | 3 | 3 | 3 | 3 |
| Total cost over 60 years, 2002 USD: | $727,704 | $1,005,554 | $38,490 | $23,063,234 |
| **Cost per kW of IT per year ($/kW/year):** | **0.941** | **1.30** | **0.0497** | **29.8** |
| **90% for producer price ($/kW/year):** | **0.846** | **1.17** | **0.045** | **26.8** |
| System self-weight (kg): | 234,000 | 10,000 | 24.3 | 400,000 |
| Number of refreshes: | 3 | 3 | 3 | 3 |
| **Weight per kW of IT per year (kg/kW/year):** | **0.907** | **0.0388** | **0.0000942** | **1.55** |

| **Component:** | **Lighting Lights** | **Lighting Presence Detectors** | **Lighting Switches** | **Motor Control Centres** |
| --- | --- | --- | --- | --- |
| Cost: | £925,940 | £20,703 | £9,327 | £555,010 |
| Year of cost: | 2011 | 2011 | 2011 | 2011 |
| Average exchange rate: | 1.604 | 1.604 | 1.604 | 1.604 |
| USD (year of cost): | $1,485,393 | $33,211 | $14,963 | $890,348 |
| Economic Index: | 0.800 | 0.800 | 0.800 | 0.800 |
| 2002 USD: | $1,187,976 | $26,561 | $11,967 | $712,075 |
| Replacement every (years): | 20 | 20 | 20 | 20 |
| Number of refreshes: | 3 | 3 | 3 | 3 |
| Total cost over 60 years, 2002 USD: | $3,563,929 | $79,684 | $35,901 | $2,136,226 |
| **Cost per kW of IT per year ($/kW/year):** | **4.61** | **0.103** | **0.0464** | **2.76** |
| **90% for producer price ($/kW/year):** | **4.15** | **0.0927** | **0.0418** | **2.48** |
| System self-weight (kg): | 29,022 | 75.2 | 101 | 322,400 |
| Number of refreshes: | 3 | 3 | 3 | 3 |
| **Weight per kW of IT per year (kg/kW/year):** | **0.113** | **0.000292** | **0.000392** | **1.25** |

| **Component:** | **PDUs** | **Remote Power Panels** | **Ring Main Units** | **Small Power Sockets** |
| --- | --- | --- | --- | --- |
| Cost: | £6,597,437 | £542,952 | £93,122 | £15,719 |
| Year of cost: | 2011 | 2011 | 2011 | 2011 |
| Average exchange rate: | 1.604 | 1.604 | 1.604 | 1.604 |
| USD (year of cost): | $10,583,608 | $871,004 | $149,387 | $25,216 |
| Economic Index: | 0.800 | 0.800 | 0.800 | 0.800 |
| 2002 USD: | $8,464,477 | $696,605 | $119,475 | $20,167 |
| Replacement every (years): | 20 | 20 | 20 | 20 |
| Number of refreshes: | 3 | 3 | 3 | 3 |
| Total cost over 60 years, 2002 USD: | $25,393,431 | $2,089,816 | $358,426 | $60,502 |
| **Cost per kW of IT per year ($/kW/year):** | **32.8** | **2.70** | **0.463** | **0.0782** |
| **90% for producer price ($/kW/year):** | **29.5** | **2.43** | **0.417** | **0.0704** |
| System self-weight (kg): | 637,200 | 67,200 | 2,800 | 313.5 |
| Number of refreshes: | 3 | 3 | 3 | 3 |
| **Weight per kW of IT per year (kg/kW/year):** | **2.47** | **0.261** | **0.0109** | **0.00122** |

| **Component:** | **Small Power Fused Connections** | **Switchboards and Switchgear** | **UPS** | **UPS Batteries** | **UPS Battery Chargers** |
| --- | --- | --- | --- | --- | --- |
| Cost: | £4,180 | £2,162,317 | £7,583,053 | £351,886 | £215,776 |
| Year of cost: | 2011 | 2011 | 2011 | 2011 | 2011 |
| Average exchange rate: | 1.604 | 1.604 | 1.604 | 1.604 | 1.604 |
| USD (year of cost): | $6,706 | $3,468,790 | $12,164,733 | $564,495 | $346,149 |
| Economic Index: | 0.800 | 0.800 | 0.800 | 0.800 | 0.800 |
| 2002 USD: | $5,364 | $2,774,242 | $9,729,018 | $451,468 | $276,840 |
| Replacement every (years): | 20 | 20 | 20 | 10 | 20 |
| Number of refreshes: | 3 | 3 | 3 | 6 | 3 |
| Total cost over 60 years, 2002 USD: | $16,091 | $8,322,726 | $29,187,054 | $2,708,805 | $830,520 |
| **Cost per kW of IT per year ($/kW/year):** | **0.0208** | **10.8** | **37.7** | **3.50** | **1.07** |
| **90% for producer price ($/kW/year):** | **0.0187** | **9.68** | **34.0** | **3.15** | **0.966** |
| System self-weight (kg): | 178.5 | 1,208,400 | 275,580 | 601,776 | 2,700 |
| Number of refreshes: | 3 | 3 | 3 | 6 | 3 |
| **Weight per kW of IT per year (kg/kW/year):** | **0.000692** | **4.69** | **1.07** | **4.67** | **0.0105** |

Assumed costs for the **generator sets**

| **Component** | **No.** | **Cost (£)** | **Total Cost (£)** | **Self-weight (kg)** | **Total Weight (kg)** |
| --- | --- | --- | --- | --- | --- |
| Gen set (including tanks) | 20 | 288,666 | 5,773,317 |  |  |
| Residential silencer | 20 | 10,936 | 218,714 |  |  |
| Gen set (not including tank) | 20 |  |  | 16,000 | 320,000 |
| Day tank | 20 |  |  | 4,000 | 80,000 |
|  |  | Total: | 5,992,031 |  | 400,000 |

**Assumptions** made in determining the components of the **electrical infrastructure** inventory

| **Component** | | **Assumption** |
| --- | --- | --- |
| Generators | Capacity | 2300 kVA |
|  | Specification | MT2300 generator |
|  | Costing | Spon's M&E 2011, page 552, net price for standby generator + residential silencer. **Generator:** three phase, 400 volt, four wire 50 Hz packaged standby diesel generating set, complete with radio and television suppressors, day tanks and piping, 4 metres of exhaust pipe and exhaust silencer, control panel, mains failure relay, starting battery with charger, internal wiring, interconnections, earthing and labels.  **Residential silencer:** performance 75 dBA at 1 m, including connection to exhaust pipe. |
|  | Weight | Generator (including all components apart from the day tank) weight taken from technical submittal.  Day tank nominally estimated to be a 1/4 of this weight. |
|  | Modelling | Modelled as NAICS sector 334515 - Electricity and signal testing instruments manufacturing, and in particular 'Generator sets, prime mover (except turbine generator sets), manufacturing'. |
| Bulk fuel tanks | Specification | Underground cylindrical single component double skinned storage tank. 80,000 litres gross capacity - Outer skin: 17,100 o/length x 2500 mm i/diameter, 4mm shell and dished ends 5 mm; Inner tank: 6 mm shell and dished ends 6 mm, steel plate, 2 x 600 mm manholes per tank - 8 total, 3 x internal stiffening rings - 12 total, and lifting lugs. |
|  | Costing | Spon's M&E 2011, page 269, net price Spon's has bulk fuel tanks of similar construction ranging from a capacity of 5600 litres to 20,000 litres. However they appear single skinned and not double skinned and do not go up to the 80,000 litres capacity required. The price from 5,600 litres to 20,000 litres will be extrapolated to 80,000 litres and an additional 50% added to account for the double skin and omission of controls. Price excludes pumps (calculated separately) Fuel storage tanks; 5mm plate mild steel to BS 799 type J; complete with raised neck manhole with bolted cover, screwed connections, vent and fill connections, drain valve, gauge and overfill alarm. |
|  | Weight | Assumed comparable to the 2,000 litre day tanks used in the generator sets (both double skinned). Weight extrapolated assuming 2,000 litre tank weighs 4,000 kg. A third of this value has then been taken because the relationship between capacity and weight is not linearly proportional. |
|  | Modelling | Modelled as NAICS sector 332420 - Metal tank (heavy gauge) manufacturing, and in particular 'Bulk storage tanks and heavy gauge metal manufacturing'. |
| Bulk fuel pumps | Specification | Kral triple screw pumps, model KV55, aluminium, 5400 litres/hr diesel oil, discharge pressure of 2 bar, 1.5 kW motor, 2900 rpm (aluminium alloy fitted with nitride spindles, mechanical seal and internal bearings) |
|  | Costing | Spon's M&E 2011, page 347, net price The only pumps in Spon's that fit the specification of the Kral pumps are centrifugal heating and chilled water pumps, belt driven or twin head belt driven. As the screw pumps are triple screw pumps, the cost of the twin head belt driven pump has been used. |
|  | Weight | Weight taken from the technical submittal - 1.5 kW pump http://www.kral.at/en/products/screw-pumps/screw-pumps-series-k/ |
|  | Modelling | Modelled as NAICS sector 333911 - Pump and pumping equipment manufacturing, and in particular 'Pumps, industrial and commercial-type, general purpose, manufacturing'. |
| Lighting - lights | Specification | Lights are a mixture of indoor and outdoor units; some with single lamps and some with twin lamps; some with emergency lighting and some without. It is therefore assumed that all are 2 x 35 W HFACF Duralite T5,  length 1500 mm, 6 kg. Nearest in Spon's is 1 x 49 W |
|  | Emergency Back-up | 35% of the lights have emergency back-up |
|  | Costing | **Lights and emergency back-up:** Spon's M&E 2011, page 639, net price Suspended linear fluorescent; T5 lamp; high frequency control gear; low brightness; 65o cut-off; 30% uplift,  70% downlight; including wedge style louvre. |
|  |  | **Area control module:** Spon's M&E 2011, page 645, net price  Control equipment: the technical specification is unclear on the type of control module and so the area control unit has been assumed. |
|  |  | **Central supervisor controller:** Spon's M&E 2011, page 645, net priceAssume the lighting control module is: central supervisor controller including software as mentioned on page 645 of Spon's |
|  |  | **Lighting control modules:** Spon's M&E 2011, page 645, net price Technical specification shows parts called EBS-BT. It is unclear what these are and so it has been assumed that these refer to lighting control modules. Lighting control module; plug in; 9 output 9 channel dimming (DALI) |
|  | Weight | Weight of the lights was taken from the technical submittal for 2 x 35 W T5. It is assumed that this accounts for the control modules because some lights are single lamps (not double as used). |
|  | Modelling | Modelled as NAICS sector 335110 - Electric lamp bulb and part manufacturing, and in particular 'Fluorescent lamp tubes, electric, manufacturing'. |
| Lighting - presence detectors | Specification | No specification found so conservatively the more expensive of the two options in Spon's was used. Universal presence detectors with photo cell; flush mounted. |
| Costing | Spon's M&E 2011, page 645, net price |
| Weight | Estimated |
| Modelling | Modelled as NAICS sector 334512 - Automatic environmental control manufacturing, and in particular 'Light responsive appliance controls manufacturing'. |
| Lighting - switches | Specification | Majority of switches are 1-way; conservatively 2 gang assumed. Metalclad assumed.  6 amp modular type switch; galvanised steel box, bronze or satin chrome coverplate; metalclad switches; flush mounting; one way; 2 gang |
|  | Costing | Spon's M&E 2011, page 642, net price |
|  | Weight | Assumed the same as the presence detectors |
|  | Modelling | Modelled as NAICS sector 334419 - Other electronic component manufacturing, and in particular 'Switches for electronic applications manufacturing'. |
| UPS | Specification | **Communications and vendor access rooms:** MGE Galaxy 7000 UPS + 1 No. 320 kW module + 1 No. static bypass switch.  **UPS rooms:** MGE Galaxy 9000 UPS + 2 No. 720 kW modules + 1 No. static bypass switch + 12 Pulse cabinets |
|  | Costing | SPON'S M&E 2011, page 656, net price.  **Communication/vendor access rooms** - 400 kVA module  **UPS rooms** - 800 kVA modules |
|  | Weight | Taken from technical specification on APC website:  **Communication/vendor access rooms** - http://www.apc.com/products/resource/include/techspec_index.cfm?base_sku=G7TUPS400&tab=compare  **UPS rooms** - http://www.apc.com/resource/include/techspec_index.cfm?base_sku=Galaxy9000 (+ 12 pulse cabinets) |
|  | Modelling | Modelled as NAICS sector 335999 - All other miscellaneous electrical equipment and component manufacturing, and in particular 'Uninterruptible power supplies (UPS) manufacturing'. |
| UPS batteries | Specification | Yuasa, sealed lead acid batteries (VRLA), SWL2500-12FR, 12 V, 90 Ah  http://export.rsdelivers.com/product/yuasa/swl2500-12fr/swl-sealed-lead-acid-battery-12v-92ah/5113533.aspx |
|  | Costing | Battery cost quoted in technical data for 12 batteries: £252.61 |
|  | Weight | Weight taken from the Yuasa technical data |
|  | Modelling | Modelled as NAICS sector 335911 - Storage battery manufacturing, and in particular 'Batteries, rechargeable, manufacturing'. |
| UPS battery chargers | Specification | CB Model Dual PCS17-110-6A-SC150-SL10Ah  Input volts: 230 volts, +/-10%, single phase 50 Hz; Input VA=1100 VA; Output Volts=110 V nominal, charger output rate = 6 amps |
| Costing | Spon's M&E 2011, page 558, net price There is no technical specification for the battery chargers and so the most expensive from Spon's has been assumed. N.B. Cost includes fixing to background, commissioning and testing, however it only charges 110 volt; 38 Ah; 3 A (valve regulated) batteries therefore assumed the commissioning and testing costs account for the higher battery capacity (90 Ah). |
| Weight | Nominally a self-weight of 50 kg has been assumed. http://www.powerpulse.net/techPaper.php?paperID=101&page=1 |
|  | Modelling | Modelled as NAICS sector 335999 - All other miscellaneous electrical equipment and component manufacturing, and in particular 'Battery chargers, solid-state, manufacturing '. |
| Switchboards | Specification | For the purpose of modelling, LV and HV switchboards are all assumed to be the same. They range from  800 A/1000 A to 3/4/5000 A with 65 kA and 80 kA breakers. It has therefore been assumed that they are all 4000 A with ACB (Air circuit Breakers) of 100 kA fault rated. There is no reference to the pole of the boards and so 3-pole (the cheaper of the two Spon's options) has been assumed as an overestimate has been used for the nominal rating (4000 A)  **PDU boards:** 1000 A, Form 4 type 7, 65 kA fault rated. Assume 3-pole **Remaining boards:** assuming ACB-100 kA fault rated, 3 pole, 4000 A (1600 mm wide) |
|  | Costing | **PDU boards:** Spon's M&E 2011, page 625, net price **Remaining boards:** Spon's M&E, page 624, net price |
|  | Weight | Figure 36 of BSRIA BG 9/2011 Rules of Thumb 5th Edition: Switchroom panels - operating weight, has been used to determine the self-weight. Capacity required. All assumed the same - 4000A 3 phase switchboards.  Capacity = 90% safety factor * √3 * Vline * I (service breaker size) / 1000  Vline = 400 V I = 4000 A Therefore capacity = 2,494 kVA |
|  | Modelling | Modelled as NAICS sector 335313 - Switchgear and switchboard apparatus manufacturing, and in particular 'Switchboards and parts, power, manufacturing'. |
| Ring main units (switchgear) | Specification | 12 kV, non-extensible RMU, such as the SABRE VRN2a (Lucy Switchgear) Includes: earth, switch, non-automatic circuit breaker, switch disconnector and Earth fault passage indication  http://www.lucyswitchgear.com/media/2443/sabre-vrn2a-technical-sales-brochure.pdf |
|  | Costing | Spon's M&E, page 557, net price |
|  | Weight | Weight taken from technical data for SABRE VRN2a |
|  | Modelling | Modelled as NAICS sector 335313 - Switchgear and switchboard apparatus manufacturing, and in particular 'Switchgear and switchgear accessories, manufacturing '. |
| Motor control centre | Specification | 400 V |
| Costing | The PDU cost was assumed. |
| Weight | A range of self-weights for 400 V MCCs were found:  http://www.acontact.com/electrical/equipment/rental/STLVMCC  Ranging from 1900 kg to 3300 kg therefore an average of 2600 kg was assumed. |
| Modelling | Modelled as NAICS sector 335314 - Relay and Industrial Control Manufacturing, and in particular 'Motor control centres, manufacturing'. |
| Distribution boards | Specification | Distribution boards range from 100-250 A and are all 15 kA fault rated.  Distribution boards and sub-distribution boards are all assumed to be HRC (High Rupture Capacity) fused distribution boards; IP4X external protection enclosure; including earth and neutral bars; fixing to backgrounds. The majority have 100 Amp incomers, 4/12 way, TP&N, therefore assumed: HRC fused distribution board, TP&N, 8 way 100 Amp. |
|  | Costing | Spon's M&E 2011, page 632, net price |
|  | Weight | Figure 36 of BSRIA BG 9/2011 Rules of Thumb 5th Edition - Switchroom panels - used to determine the self-weight. Capacity required. All assumed the same – 100 A incomers, 3 phase switchboards.  Capacity = 90% safety factor * √3 * Vline * I (service breaker size) / 1000  Vline = 400 V I = 100 A Therefore capacity = 62 kVA  Nb. The chart was extrapolated to find the weight of a unit with capacity < 200 kVA |
|  | Modelling | Modelled as NAICS sector 335313 - Switchgear and switchboard apparatus manufacturing, and in particular 'Switchboards and parts, power, manufacturing'. |
| Remote power panels | Specification | 42 per data hall. 8 data halls.  ABB manufacturer |
|  | Costing | Spon's M&E 2011, page 625, net price Project costing gave a combined cost that included: Switchgear/RPP's/ENMS. It is therefore assumed that the RPPs are similar in nature and cost to the sub-distribution boards above. |
|  | Weight | RPPs are single cabinets at the end of each row in the data hall, and are similar in weight to racks. Racks of 121 kg have been assumed and so nominally an RPP self-weight of 200 kg has been assumed to account for the additional electrical components within the unit. |
|  | Modelling | Assumed the same as a PDU even though an RPP does not include a transformer. Modelled as NAICS sector 335311 - Power, distribution, and specialty transformer manufacturing. |
| PDUs | Specification | 12 No. PDUs per hall. 8 No. halls. 2 No. PDUs per communication/vendor access room. 6 No. rooms.  PDUs to provide a redundant capacity of 2 No. PDU to include static transfer switch and isolating transformer. |
|  | Costing | Spon's M&E 2011, page 126, Approximate Estimating - Elemental Costs for data centre example. |
|  | Weight | Figure 36 of BSRIA BG 9/2011 Rules of Thumb 5th Edition: Switchroom panels - used to determine the self-weight. Capacity required. All assumed the same – 100 A incomers, 3 phase switchboards.  Capacity = 90% safety factor * √3 * Vline * I (service breaker size) / 1000  Vline = 400 V I = 1000 A Therefore capacity = 624 kVA |
|  | Modelling | PDU is used to transform one or more, larger capacity raw power feed into any number of lower capacity distributed power feeds. Modelled as NAICS sector 335311 - Power, distribution, and specialty transformer manufacturing, and in particular 'Power transformers, electric, manufacturing '. |
| BMS | Specification | Fibre optic cable = OM3 50 µm MMOF  Ethernet cable = CAT 6 STP (shielded twisted pair)  IT equipment assumed the same as Ecoinvent processes for these components. |
|  | Costing | Taken from the project cost report. Although individual components can be modelled using existing LCA data from the Ecoinvent library, it has been decided to assess the system as a whole using input output data as it is difficult to quantify the numbers and costs of the remaining components within the system.  The costs from the executive summary of the project cost report 8 are for the first stage of the build. As part of the system is already in place for the second stage, and the two stages are not identical (second stage is smaller), it has been nominally assumed that stage 2 costs are 75% of those in stage 1: Stage 1 = £1,644,077 |
|  | Weight | PC weight includes the desktop, monitor, keyboard and mouse.  Remaining weights were estimated. |
|  | Modelling | Modelled as NAICS sector 334515 - Electricity and signal testing instruments manufacturing, and in particular 'Measuring equipment for electronic and electrical circuits and equipment manufacturing'. |
| Small power - sockets | Specification | Sockets assumed to have the same finish as the lighting switches.  Socket outlet; switched; 13 Amp; BS 1363; galvanised steel box, satin chrome coverplate; BS4662;  flush fixed - 2 gang. |
|  | Costing | Spon's M&E 2011, page 647, net price |
|  | Weight | Nominal estimate. |
|  | Modelling | Modelled as NAICS sector 33539 - Wiring device manufacturing, and in particular 'Sockets, electric, manufacturing'. |
| Small power - fused connections | Specification | Sockets assumed to have the same finish as the lighting switches.  Connection units; galvanised pressed steel pattern; galvanised steel box; satin chrome or satin brass finish; white moulded plastic inserts; flush mounted - standard fused. |
|  | Costing | Spon's M&E 2011, page 649, net price.  (Fused connection, unswitched) |
|  | Weight | Nominal estimate. |
|  | Modelling | Modelled as NAICS sector 33539 - Wiring device manufacturing, and in particular 'Sockets, electric, manufacturing'. |
| CCTV | Specification | 65 internal CCTV and 37 external CCTV |
|  | Costing | Spon's M&E 2011, page 128, approximate estimating - elemental costs for example data centre. System is costed as a whole. |
|  | Weight | Twilight CCTV cameras: Assume all are internal dome cameras, and weight includes allowance for security equipment cabinets (8 No.) and intercoms (2 No.).  Weight 0.366 kg for the CCTV and 0.234 kg for cabs and intercoms (estimated) http://www.cctvdirect.co.uk/javascript/tinymce/plugins/filemanager/files/TWILIGHT_PRO_INTERNAL_4-9MM.pdf |
|  | Modelling | Modelled as NAICS sector 334220 - Broadcast and wireless communications equipment, and in particular 'Closed circuit television equipment manufacturing'. |
| Gas detection | Specification | System includes a gas monitoring panel (Gasmonitor plus). The 8 detectors consist of 4 No. CROWCON Nimbus infrared methane gas detectors and 4 No. CROWCON IR open path ethylene gas detectors. The technical submittal shows 4 monitors for the first stage and so has been doubled for the second stage of the facility. |
|  | Costing | Crowcon were emailed for costs, but wouldn't provide them. Costs for a ‘FIXED’ detection system could not be found in any technical literature, so costs were found for an equivalent ‘PORTABLE’ Crowcon system.  These were found on www.gasalarmsystems.co.uk.  http://www.gasalarmsystems.co.uk/shop/crowcon-detective-ir.html  Because the costs were for a (cheaper) portable system, conservatively they were doubled. |
|  |  | **Gasmonitor Plus:** modelled as a Crowcon detective with pumped base unit. |
|  |  | **Nimbus methane (flammable) gas detector:** modelled as a Tripleplus + sensor 0-100% LEL flammable gas. |
|  |  | **IR open path ethylene gas detector:** modelled as a Dual range 0-100% LEL + 0-100% volume ethylene IR |
|  | Weight | Gasmonitor self-weight taken from the technical submittal. Gas detectors: http://software.crowconsupport.co.uk/Pdatasheets/NimbusGB.pdf |
|  | Modelling | Modelled as NAICS sector 334518/9 - Watch, clock, and other measuring and controlling device manufacturing, and in particular 'Gas leak detectors manufacturing'. |
| Freight lifts | Specification | 2 No. freight lifts added in the first stage of the build and a further two in the second stage. |
|  | Costing | Estimated final cost was taken from the project cost report and halved to represent the producer price and none of the overhead costs such as profit and installation costs. |
|  | Weight | Nominal estimate. |
|  | Modelling | Modelled as - Elevators and moving stairways (NAICS sector not specified). |
| Containment (power) | Specification | Containment for power and services cabling is a combination of heavy duty ladders and medium duty trays.  Average width of containment found to be 305 mm.  All modelled as: 300 mm wide Unitrunk Speedway Ladders - SW5/SL3/300/G (Speedway SW5 straight ladder, 600 mm wide, hot dip galvanised). |
|  |  | 10% added to lengths to account for drops.  10% added to self-weight to account for fixtures and fittings. |
|  | Weight | Containment self-weight: 19.94 kg/m3 length, therefore 7.31 kg/m (including 10% for fixtures and fittings). |
| Cabling (power) | Quantity | The number of cables per ladder/tray was based on drawings, but derived by visual estimate as cables do not run for the entire length of the ladders. 1 cable assumed where containment was called up but no cable numbers specified. |
|  | Specification | 120 XLPE/SWA/LSF/Cu (all insulated) - taken from technical submittal. |
|  | Weight | Self-weight taken from SimaPro process - 1.04 kg/m |
| Containment (lighting wiring) | Specification | Two types of containment:  **3-compartment trunking:** (RMS trunking - AGT33/3 or Unistrut MT33 3 compartment trunking), and **Standard (single compartment) trunking:** (RMS trunking - AGT33/1).  http://www.rmselectrical.co.uk/index.php/cable-trunking Each single compartment = 75 mm x 75 mm x 1.2 mm thick (galvanised steel). |
|  | Weight | **3-compartment self-weight**: 7.065 kg/m, using 7850 kg/m3 from BS 648.  **Standard trunking:** 2.355 kg/m (as above). |
| Cabling (lighting) | Lengths | There was a lot of ambiguity in the length of lighting cable so 50% was added to account for routing. |
| Weight | Self-weight taken from SimaPro process - 1.04 kg/m |
| Specification | As above (for cable (power)) assumed. |
| Bulk fuel reinforced concrete | Specification | Normal weight concrete. |
| Volume | Volume established by taking the volume of the tank away from the volume of total encased area (i.e. the volume of the tank and the surrounding concrete combined).  Total encased volume: ((16721+2*500)*(4*2514+2*500+3*300)*(2514+300+150+100))/2 (length = 16,721mm, additional concrete length = 500mm, diameter = 2514mm, assume 500mm either side). Tank volume: ((PI()*((2514/2)^2))*16721)/2  (diameter = 2,514 mm, length = 16,721 mm). This accounts for the surround of 4 tanks. The weight is doubled to account for 8 tanks (2 sets of 4 No. tanks). |
| Self-weight | Reinforced concrete density: 2400 kg/m3,  2% reinforcement |
| Bulk fuel pea shingle | Volume | Calculated as above for the reinforced concrete. |
| Self-weight | 20 mm Pea Shingle: 1429 kg/m3 (1 tonne = 1,000 kg; 283 m3 is 404.44 tonnes)  https://stone2yourhome.co.uk/calculator/ |
| Bulk fuel steel pipework | Lengths | Taken from the technical submittal |
| Specification | 50 mm (Size 2 40ST) - http://www.pipemarkers.com/pipe-data.php 25 mm (Size 1 40ST) - http://www.pipemarkers.com/pipe-data.php |
| Self-weight | 50 mm (Size 2 40ST) - 5.43 kg/m (converted from 3.65 lb/ft) 25 mm (Size 1 40ST) - 2.50 kg/m (converted from 1.68 lb/ft) |
| Bulk fuel cable | Lengths | Lengths taken from technical submittal |
| Self-weight | Self-weight taken from SimaPro process - 1.04 kg/m |
| Transformers | Specification | Shown in inventory data tables |
|  | Quantity | Data halls: 3 No. transformers per hall. 8 No. halls. 8 No. chiller substations. 4 No. substations per chiller enclosure. 2 No. enclosures |
|  | Self-weight | Self-weight of the 3000 kVA transformers assumed for all. Self-weight taken from technical submittal. |

##### Assumptions – Built Structure

Assumed **costs** for the **linoleum** of the **built structure** inventory

| Component: | BMS |
| --- | --- |
| Cost: | £2,877,135 |
| Year of cost: | 2009 |
| Average exchange rate: | 1.565 |
| USD (year of cost): | $4,502,500 |
| Economic Index: | 0.839 |
| 2002 USD: | $3,775,571 |
| Replacement every (years): | 20 |
| Number of refreshes: | 3 |
| Total cost over 60 years, 2002 USD: | $11,326,714 |
| **Cost per kW of IT per year ($/kW/year):** | **14.6** |
| **90% for producer price ($/kW/year):** | **13.2** |
| System self-weight (kg): | 84,834 |
| Number of refreshes: | 3 |
| **Weight per kW of IT per year (kg/kW/year):** | **0.329** |

**Assumptions** made in determining the components of the **built structure** inventory

| **Component** | | **Assumption** |
| --- | --- | --- |
| Indicative Life Years | | It is assumed the structural elements - walls, concrete, reinforcement, steel beams are NOT replaced in the 60 year life time. Components that undergo wear and tear are replaced every 20 years in line with the assumed commercial life of the building: insulation, paint, linoleum, raised floors, suspended ceiling tiles. |
| Precast concrete | Specification | **Ground floor perimeter beam:** PC Quickwall  Includes the length above the retaining walls. Assumes the same cross section throughout.  **Chiller compound:** 200 mm precast concrete planks, to top of the service trench. Normal weight concrete. |
|  | Self-weight | Reinforced concrete density: 2400 kg/m3 |
|  | Volume | **Perimeter beam (area):** (0.5*0.145)+(1.975*0.08)+(0.55*0.36) **Perimeter beam (length):** 2*8*3+8.125*4+8.125*8+8*26+8.125*16+4-0.329/2-62*0.329+11.025*2+10.035*2+2*(SQRT(6^2+6^2)) |
|  | Quantity | Established from project drawings |
| Wall covering | Specification | Includes ceiling build-up  Plasterboard (walls): 12.5 mm Gyproc FireLine (2 layers), 1200 mm wide Plasterboard (ceiling): Gypsum plasterboard  Plaster (walls): 2 x 12.5 mm layers to both sides Plaster (ceiling): 2 x 12.7 mm layers on both sides |
|  | Self-weight | Partitions - 12.5 mm Gyproc FireLine (2 layers): 9.8 kg/m2 Ceiling - Gypsum plasterboard, 12.7 mm thick: 11.2 kg/m2 (BS 648)  Plaster (walls): 11.2 kg/m2, one coat both sides (BS 648) Plaster (ceiling): 22 kg/m2, two coats both sides (BS 648) Water - 0.246 kg of water per kg of plaster (taken from Ecoinvent process for plaster) |
| Suspended ceiling tiles | Specification | Tegular exposed grid metal suspended ceiling.  Black fleece inlay insulation - glass fibre insulation assumed. http://www.burgessceilings.co.uk/products.html?catid=8&pid=51 |
|  | Self-weight | Tile and support system: 12.5 kg/m2 (from technical submittal) Of which following split assumed: 90% steel, 5% insulation, 5% polyester powder coating NB. aluminium was included in the specification, but not the technical submittal therefore omitted |
| Raised floor | Specification | **Raised Floor** - Kingspan FDEB 38 Air Sealed Raised Floor http://www.barbourproductsearch.info/Kingspan%20FDEB%20PSA%20data%20sheet-file020474.pdf **Grilles:** Gilbert GFX/600/5 Mill Finish High density particle board  **Raised floor tile laminate** - Factory bonded Integral Sonae range. The laminate and particle board weights are combined and assessed collectively. A laminating process was used to model the manufacturing of the components into the raised floor tiles. **Steel:** Kingspan heavy grade Alpha III (support pedestals); Red oxide mesh deck base plates 200/300 mm (connections-nickel plated, modelled non-plated); Kingspan heavy grade (stringers - nickel plated, modelled non-plated). **Stringer assumption:** T section: 3 mm x 600 mm x 20 mm (flange) and 3 mm x 600 mm x 35 mm (flange) |
|  | % grilles vs. tiles | An estimate for the number of grilles was calculated from the specification:  406 No. grilles with hit and miss dampers, and 43 No. grilles with Motorised Control Dampers for cooling  Assuming each grille is 600 mm square, the total floor area made up of grilles is 161.6 m2.  Each data hall is 35.7 m x 36 m = 1284 m2.  The floor grilles therefore account for 12.6% of the floor and the tiles for 87.4% |
|  | Self-weight | Particle board: 800 kg/m3 (BS 648 gives wood chipboard (Heavy) density of 772kg/m3 therefore conservatively 800 assumed).Steel: 7850 kg/m3 (BS 648). ABS: 1040 kg/m3 http://www.sselec.com/data/ins%20specs/ABS%20Data%20sheet.pdf |
|  | Weight | Weight of raised floor in the communications and vendor access rooms is extrapolated from the floor area and weight of the data hall floors (comparing the total floor space, i.e. data hall = 1230 m2).  Steel: pedestals, connections and stringer weight per m2 has been established by determining the number of each in a 9 m2 area (this is a grid of 25 tiles, 5 x 5 tiles).  Weight of one pedestal that provides a 250 mm void = 1.05 kg (established by phoning Kingspan). Weight of connections = 10% of pedestals = 0.105 kg  Weight of stringers = T section: 3 mm x 600 mm x 20 mm (flange) and 3 mm x 600 mm x 35 mm (flange) = 0.8 kg. In a 9 m2 area, there are 25 No. pedestals and corresponding connections, and 50 No. stringers. Therefore weights on plan:  Pedestals = 1.05 x 25 / 9 = 2.92 kg/m2; Connections = 0.292 kg/m2; and  Stringers = 0.8 x 50 /9 = 4.44 kg/m2. Steel sheet tray - extra 0.05mm added to thickness to account for the edge of the tray. |
|  | Manufacturing | Amount of manufacturing assumed to total the mass of the components |
| Aluminium | Specification | **Floor grilles:** Gilbert Floor Grille GFX/600/5 (Mill Finish) WITH C/W hit and miss dampers and alignment pips (all assumed to be fitted with hit and miss dampers. **Roof cladding:** Stucco embossed (Mill Finish; PVF Coated; ARS Coated; Polyester Coated) - KB400/65, 0.9 mm th. **Louvres:** insect mesh included (aluminium woven mesh wire, treated, coloured charcoal grey) |
|  | Self-weight | **Floor grilles:** self-weight established by contacting manufacturers: 110608 Email GFX6005 Gilbert Floor Grille.  **Roof cladding/louvres:** 2771 kg/m3 (BS 648). **Louvres:** 20% assumed for connections and mullions for louvres; 5% assumed for bird mesh. |
|  | Dimensions | **Roof:** plan dimensions used even though the roof is pitched. 20% lapping assumed for the aluminium sheet. Area = 1.2*(16*8.125)*(26*8+(26*8/0.4)*4*0.065)  **Louvres:** because of the slant and overlap of the louvre blades, it has been assumed there is 3 times the plan cross sectional area. |
| Insulation | Specification | **Roof insulation:** 80 mm thick HCFC free (LPC Grade B) - conservatively 160 mm assumed. **Elevation insulation:** Fibreglass insulation quilt, 14 mm thick. **Walls (partition type 2):** Isover APR 1200 glass mineral wool, 25 mm thick. |
|  | Self-weight | Glass fibre - thermal insulation of roofs and walls, 0.5 kg/m2 for 1 inch thickness (BS 648) |
|  | Dimensions | **Roof area:** (16*8.125)*(26*8+(26*8/0.4)*4*0.065) |
| Blockwork wall | Specification | **Blockwork:** 2 skins - 440 x 215 x 100 mm **Mortar:** 1:1:6 cement:lime:sand (No plasticisers - which produce air bubbles which allow the water to expand in freezing conditions - are included). |
|  | Doors | Door openings ignored. |
|  | Weight | **Blockwork:** Blockwork - Masonry wall (280 mm cavity) - 102.5 mm brick = 215.4 kg/m2 (solid concrete blockwork, stone aggregate - BS 648) **Mortar:** 1 m2 of single skin blockwork needs 2 No. 25 kg bags of bricklaying mortar, therefore  self-weight = 50 kg/m2 (on elevation). **Water**: 2.5 litres per 25 kg of mortar, therefore 5 litres/m2. Density = 1000 kg/m3 (BS 648). http://www.wickes.co.uk/content/ebiz/wickes/resources/images/gil/13.pdf http://www.source4me.co.uk/calculate_brick_block_mortar.php |
| Doors | Specification | Assumed: 1000 mm x 2500 mm.  1 No. double door = 2 No. single doors.  The door frame is made of massive wood, the door leaf is made of wood with a glass insert (62 % wood, 38% glass). The lock, door handles and frame joints are fabricated from steel.  Gatehouse single door = Security door – 910 mm x 2450 mm. Substation 1.5 door = 1055 mm x 2120 mm (assumed double).  Substation double door = 1700 mm x 2740 mm. |
|  | Weight | Weight of single door = 27.6 kg/m2 (from Ecoinvent process). |
| Gravel (limestone) | Specification | A medium density limestone like portland stone was assumed (BS 648:1964).  Gravel – 225 mm single sized washed limestone chippings. Self-weight = 1554 kg/m3 (http://www.simetric.co.uk/si_materials.htm). |
| Damp proof membrane | Specification | Visqueen BBA Damp Proof Membrane - Assumed 300 mm nominal thickness, 1200 gauge.  http://www.visqueen-membranes.co.uk/ |
|  | Self-weight | LDPE: 910 kg/m3 (range from .910 - .940 g/cm3). |
| Sand | Self-weight | Sand, dry: 1602 kg/m3 (http://www.simetric.co.uk/si_materials.htm) |
| Plywood | Specification | 25 mm thick birch faced plywood. Modelled as plain plywood |
|  | Self-weight | 600 kg/m3 (BS 648) |
| Floor covering | Specification | Linoleum with LPX finish, jute fabric backing (from technical submittal) on 6mm plywood |
|  | Self-weight | **Linoleum:** 4.7 kg/m2.  **Plywood:** 3.6 kg/m2 (6mm thick, BS 648) |
| Reinforced concrete | Specification | Normal weight concrete. 0.5% steel for anything ground bearing.  1% steel for special ground bearing cases.  2% steel for foundations and anything suspended. |
|  | Self-weight | Density = 2200 kg/m3 (screed); 2400 kg/m3 – 2448 kg/m3 (normal weight concrete). |
|  | Chambers | Worst case 'Draw Pit Type H' assumed everywhere - 1950 x 1175 mm internal dims - slab overhang ignored. |
|  | Chiller trench | Drops in height ignored. |
|  | Substation raft foundations | Slab thickness assumed |
|  | Prestressed units | Modelled as reinforced concrete |
|  | Concrete walls | Partition type 7, 550 mm high x 150 mm wide, A393 mesh H12 Dowels @ 200 c/c, H12 corner bars at 200 c/c |
|  | Perimeter ground beam | Assumed to run between pads on gridlines 6 and 20 in the docking area. |
| Ground floor | Dimensions | Average screed thickness of 50 mm assumed.  Assume an extra 100 mm of concrete on width of BM strips to account for edge slope (water and sprinkler tank slabs). |
| Walls | Specification | 15 types of walls, 3 types assumed to model all walls. |
|  | 2 | **Lightweight partition 198 mm cold rolled studs 146 mm (tbc) lining, 2 x 12.5 mm fireline board, 1 x 12.5 mm plaster both sides** |
|  | 10 | **Blockwork 2 x 100 mm skins, painted** |
|  | 12 | **Reinforced concrete bund wall** |
|  | Reinforcement | Blockwork walls: steel bed reinforcing mesh every 3rd course - Murfor RND/Z 100 mm |
| Paint | Surface area | The surface area of a 203 x 203 x 46 UC steel section has been assumed for all beams (apart from those in the substation) that are painted.  Section perimeter = (2*203)+(2*203)+2*(203-7.2) = 1203.6 mm.  Surface area/m = 1.2036 m2/m. For the **substation** the surface area of a 203 x 102 x 23 UB steel section has been assumed for all painted beams.  Section perimeter = (2*101.8)+(2*203.2)+2*(101.8-5.4) Surface area/m = 0.8028 m2/m. |
|  | Intumescent | **Nullifire S707-60** (1 hour).  Waterborne intumescent paint.  150 microns dft (dry film thickness).  0.75 litres/m2 at 1.5 mm dft. (http://www.nullifire.com/datasheets/pdfs/S707-60.pdf) Coverage: 1/4 of any beam, therefore: 0.188 litres/m2.  3/4 of composite beam painted - because most of the beam is covered (decking and concrete, ceiling) |
|  | Primer | L489 Zinc Phosphate (**Alkyd** paint).  75 microns dft (http://www.leighspaints.com/en/Products.aspx?tab=2&GenericProduct=L489) Coverage: 7.7 m2/litre, therefore: 0.130 litres/m2.  (http://www.leighspaints.com/en/Products.aspx?tab=2&GenericProduct=C237) |
|  | Epoxy resin | Assume epoxy resin finish to all ground floor slab (assume same colour). Thermoguard heavy duty floor paint (two pack epoxy).  1 coat = 20m2/litre. Dustproof areas assumed to have epoxy resin finish |
|  | Inner surface | Two-coat corrosion resistant primer with heat cured polyester topping. 2 No. layers of top coat.  0.185 litres/m2. |
|  | Top coat/ outer surface | Resistex C237 acrylic urethane sheen finish. 60 microns dft. http://www.leighspaints.com/en/Products.aspx?tab=2&GenericProduct=C237 10.8 m2/litre, therefore: 0.0926 litres/m2. http://www.leighspaints.com/en/datasheets/TC237%20-%20Issue%2012.pdf |
|  | Dulux primer | 15m2/litre therefore 0.067 litres/m2. |
|  | Dulux vinyl matt | 15m2/litre therefore 0.067 litres/m2. |
|  | Bracing | Not painted |
|  | Cladding | Does not have intumescent paint.  Inner surface = 1 No. coats of top coat sealer + 1 No. coat of primer.  Outer surface = 1 No. coat of top coat sealer. |
|  | Beams/  columns | Primer + intumescent |
|  | Elevations | Surface area is reduced by 20% to account for louvre openings |
|  | Self-weight | 1 litre = 1 kg  http://www.decoratorsdepot.co.uk/shop/pc/viewPrd.asp?idproduct=1&idcategory=1 |
|  | Modelling | All modelled as the same alkyd paint. |
| Mesh flooring | Specification | Elefant, pressure welded gratings, SP and N types |
|  | Size | 40 bars of 3 mm thickness spanning 1500 mm.  40-1=39 openings.  1500/39 = 38.5 mm (maximum spacing).  therefore assume 30 x 30 mesh size |
|  | m/m2 of secondaries | 22 beams per line, 2 lines, in 4 grids.  Length = 4000 mm.  Total area of 4 grids = 4 x 8 m x 8.125 m = 260 m2. Therefore: (22 beams x 4 m x 2 lines) / 260 = 0.68 m/m2. |
| Steelwork | Bracing | Cold formed Grade 50 (S355).  Assume bracing is also evident in two non-uniform bays around GL L (grid line). |
|  | Primary and secondary beams | Hot rolled Grade 50 (S355).  Assume all blast cleaning occurs after fabrication. |
|  | Bolted connections | Grade 8.8 Zinc plated.  Self-weight is 10% of beams - includes an allowance for baseplates. |
|  | Self-weight | Self-weight determined for an average bay.  **CHS:** http://sketchup.engineeringtoolbox.com/UK-CHS-Circular-Hollow-Sections-c_98.html  **Flat sections:** http://sketchup.engineeringtoolbox.com/UK-flat-structural-sections-c_99.html  139.7 x 4 CHS: weight of 139.7 x 5 CHS used; 244.5 x 5 CHS: weight of 244.5 x 6.3 CHS used; 273.5 x 5 CHS: weight of 273.5 x 6.3 CHS used.  **Cross Bracing:** From http://sketchup.engineeringtoolbox.com/UK-flat-structural-sections-c_99.html  88.9 x 3.6 CHS: weight of 88.9 x 4 CHS used. |
|  | Modelling | All steel modelled using worldsteel inventory data. Minimum of: S275JO |
| Composite flooring | Studs | Studs/m2 = (length of steel beam/2*5)/0.3/area in which beams are, where 0.3 m is the c/c of studs.  1 stud = 0.2264 kg (from technical data) |
|  | Specification | 150 mm deep concrete with A252 mesh at top (2 No. H8 bars per trough (Bottom) where required) on Richard Lees Ribdeck AL 50/1.2 Gauge decking, 10% for fixings and laps; Nelson 19 dia. 95mm L.A.W (length after welding) unthreaded (assumed) shear studs, 1 per trough/300 mm c/c (4 inch length before welding and ¾ in. Diameter - Nelson catalogue http://www.nelsonstud.com/cat-pdf/generalinfo.pdf) |
| Elevations | Specification | **External:** 0.4 mm thick EUROCLAD 19/1000, bright white liner tray **Internal:** 0.7 mm thick EUROCLAD 32/1000, DOBEL 200XT Plastisol finish - cobalt blue **Support System:** ASHGRID AG40 spacer system (assumed two brackets over 1 m, 135 mm deep (120 mm)).  Rails at 1200 mm centres (maximum) **Chiller elevations:** 0.7 mm Euroclad 32/1000 horizontally laid. Double sided plastisol coated steel sheets, coloured solent blue (outer face) and solent/sargasso blue (inner skin). |
|  | Self-weight | **External:** 3.489 kg/m2 (nominal) - 20% added to weight for 100 mm overlap on two sides of each sheet, therefore: 4.198 kg/m2 assumed. **Internal:** 8.104 kg/m2 assumed (as above). **Support:** 1.25 kg/m |
|  | Area | Façade area is exclusive of the louvres openings |
|  | Cladding | 1 m panels |
| Gatehouse | Specification | Complete drawings do not exist so construction assumed same as the substation control and switchrooms. |
|  | Roof | **Panels:** KS1000 RW Kingspan Roof Panels (assumed EcoSafe – 85 mm Overall thickness).  **Trusses:** No information could be found for the D20TRW Lattice truss (Metsec) and so a weight for Metsec MG80 was assumed (10 m span - page 34 of catalogue).  Insulation assumed the same as the insulation in the facility roof. |
|  | Trusses | D20TRW Lattice Truss - Metsec - 5 assumed |
|  | Walls | Metek wall cladding assumed (see plan).  Steel bed reinforcing mesh every 3rd course - Murfor RND/Z 100 mm.  Insulation/paint assumed the same as the facility walls. |
|  | Paint | As detailed drawings did not exist a nominal 50 litres of primer and 50 litres of intumescent were assumed. |
| Substation | Roof | Purlins and bracing includes 4 No. Eaves beams, although drawing shows them as 170E20 Eaves Beam.  Cladding as for the gatehouse.  50 mm concrete + 150 mm prestressed units |
|  | Wall | **Wall Cladding Panels** - KS1000 MR Kingspan Wall Panels (Horizontally laid – 80 mm core thickness assumed).  http://www.kingspanp anels.com.au/Products/Insulated-Wall-Systems/Kingspan-Micro-rib/Product-Information/KS1000_AWP---Downloadable-spec-sheet.aspx **Walls** - assume 2 skins of 100 mm block  (ignore door openings which should account for the line of 2 skins of 140 mm block.  Finish (paint) as for the facility walls. |
|  | Foundations | Pilecaps and ground beams (screen). Raft foundations and upstand beams (substation).  Dimensions taken from drawings |
|  | Lintels | Worst case assumed (including 4+8 door lintels) - 140 x 215 x 2100 mm |
| Roof |  | See aluminium above (cladding) and steel (roof steelwork). |
|  |  | Gutters and drip trays for the rainwater harvesting are accounted for in the PH infrastructure. |
| Stairs | Finish | **Infill panels:** 40% free area |

##### Modelling ASSUMPTIONS – Manufacturing

Nomenclature for the tables that follow in Appendix 4

| **CH** | Switzerland |
| --- | --- |
| **CN** | China |
| **DE** | Germany |
| **Eco** | Ecoinvent v2.2 |
| **Eco (alt)** | Ecoinvent v2.2 process with alterations |
| **Eco (com)** | New process made up of Ecoinvent v2.2 processes |
| **ELCD** | European life cycle database |
| **ELCD (alt)** | ELCD process with alterations |
| **GLO** | Global |
| **Id 2.0** | Industry data 2.0 |
| **IfT** | Inputs from the technosphere (materials/fuel) |
| **IN** | India |
| **JP** | Japan |
| **OtT** | Outputs to the technosphere (waste and emissions to treatment) |
| **RER** | Europe |
| **RER (Country)** | Data from whole of Europe, used with particular reference to the country in brackets |
| **RLA** | Latin America and Caribbean |
| **US** | United States/North America |
| **USA** | USA input output database 2002 |
| **USA IO** | USA input output database |
| **USLCI** | US life cycle inventory database |
| **ws** | Worldsteel data |

Processes used to model the **IT infrastructure** (49 sites in 17 countries includes: CN, IN, JP, US, RLA, RER)

| **Component** | **Process** | **Library** | **Non Mass** | **Conversion** | **Coverage of System Boundaries** | |
| --- | --- | --- | --- | --- | --- | --- |
| **Geographical** | **Technological** |
| Ethernet Cable | Cable, network cable, category 5, without plugs, at plant | Eco |  | 0.0036 kg/m | GLO | Wire drawing (Copper), plastic extrusion (LDPE, PVC), tin coating. |
| Cold Aisle Containment | Steel hot-dip galvanised, cradle to gate | ws | x | x | 49 sites in 17 countries | Average |
| **Fabrication of containment** | Steel product manufacturing, average metal working | Eco | x | x | RER | Average |
| **Transport to fabrication** | Transport, lorry 16-32t, EURO4 | Eco | x | x | RER (DE) | Diesel |
| Networking | Router, IP network, at server | Eco |  | 1.15 kg/piece | CH | Average |
| Racks | Chassis, network main devices | Eco | x | x | RER (CH) | Average |
| Servers | Desktop computer without screen, at plant | Eco |  | 11.3 kg/piece | GLO | Steel processing - rolling, cutting, mill cutting, and coating. Plastic parts - blow moulded or extruded into required shapes. Parts (capacitors, resistors, microchips etc.) - mounted onto the PWB are described in the individual datasets. |
| Storage | HDD, desktop computer, at plant | Eco |  | 1.15 kg/piece | GLO | The metal processing - rolling, cutting, section bar extrusion and coating. Plastic parts are blow moulded or extruded into required shapes. |

Processes used to model the **MECHANICAL infrastructure** (49 sites in 17 countries includes: CN, IN, JP, US, RLA, RER)

| **Component** | **Process** | **Library** | **Non Mass** | **Conversion** | **Coverage of System Boundaries** | |
| --- | --- | --- | --- | --- | --- | --- |
| **Geographical** | **Technological** |
| Battery Cooling | Air conditioning, refrigeration, and warm air heating equipment manufacturing SE | USA |  | 34.2 US$/kg | US | Average - NAICS sector 333415 |
| Chilled Water System | Air conditioning, refrigeration, and warm air heating equipment manufacturing SE | USA |  | 11.4 US$/kg | US | Average - NAICS sector 333415 |
| Condenser Water System | Air conditioning, refrigeration, and warm air heating equipment manufacturing SE | USA |  | 33.4 US$/kg | US | Average - NAICS sector 333415 |
| Ductwork (Steel) | Steel hot-dip galvanised, cradle to gate | ws | x | x | 49 sites in 17 countries | Average |
| **Fabrication of ductwork** | Steel product manufacturing, average metal working | Eco | x | x | RER | Average |
| **Transport to ductwork fabrication** | Transport, lorry 16-32t, EURO4 | Eco | x | x | RER (DE) | Diesel |
| Free Cooling System | Air conditioning, refrigeration, and warm air heating equipment manufacturing SE | USA |  | 18.9 US$/kg | US | Average - NAICS sector 333415 |
| Mineral Wool Insulation | Rock wool, packed, at plant | Eco | x | x | CH | Technically high level |
| Motorised Control Dampers | Automatic environmental control manufacturing SE | USA |  | 20.8 US$/kg | US | Average - NAICS sector 334512 |
| Pipes (Copper) | Cathode, copper, primary copper production | Eco | x | x | GLO | Average - Electrorefining of copper anode |
| **Fabrication of copper pipes** | Copper product manufacturing, average metal working | Eco | x | x | RER | Average |
| **Transport of copper to fabrication** | Transport, lorry 16-32t, EURO4 | Eco | x | x | RER (DE) | Diesel |
| Pipes (Plastic - PVC, ABS, MDPE, HDPE) | PVC pipe E | Id 2.0 | x | x | RER, western | Average |
| Pipes (Steel) | Steel welded pipes, cradle to gate | ws | x | x | 49 sites in 17 countries | Average |
| Pressurisation | Air conditioning, refrigeration, and warm air heating equipment manufacturing SE | USA |  | 119 US$/kg | US | Average - NAICS sector 333415 |
| Radiant Heaters | Heating equipment (except warm air furnaces) manufacturing SE | USA |  | 110 US$/kg | US | Average - NAICS sector 333414 |
| Ventilation | Air conditioning, refrigeration, and warm air heating equipment manufacturing SE | USA |  | 2.97 US$/kg | US | Average - NAICS sector 333415 |

Processes used to model the **ELECTRICAL infrastructure** (49 sites in 17 countries includes: CN, IN, JP, US, RLA, RER)

| **Component** | **Process** | **Library** | **Non Mass** | **Conversion** | **Coverage of System Boundaries** | |
| --- | --- | --- | --- | --- | --- | --- |
| **Geographical** | **Technological** |
| BMS | Electricity and signal testing instruments manufacturing SE | USA |  | 40.1 US$/kg | US | Average - NAICS sector 334515 |
| BF Power Cable | Cable, three-conductor cable, at plant | Eco |  | 1.04 kg/m | GLO (CH) | Data from one producer |
| BF Pea Shingle | Crushed stone 16/32, open pit mining, production mix, at plant, undried | ELCD | x | x | RER | Standard mineral product used as natural aggregates in the construction industry |
| BF Pipework (Steel) | Steel welded pipes, cradle to gate | ws | x | x | 49 sites in 17 countries | Average |
| BF RC Concrete | Concrete, normal, at plant | Eco |  | 2380 kg/m3 | CH | Average |
| BF RC Reinforcement Steel | Reinforcement steel, cradle to gate | ws | x | x | 49 sites in 17 countries | Average |
| BF Tanks (control, alarms, LCD) | Metal tank (heavy gauge) manufacturing SE | USA |  | 0.512 US$/kg | US | Average - NAICS sector 332420 |
| BF Transfer Pumps | Pump and pumping equipment manufacturing SE | USA |  | 190 US$/kg | US | Average - NAICS sector 333911 |
| Power Cable | Cable, three-conductor cable, at plant | Eco |  | 1.04 kg/m | GLO (CH) | Data from one producer |
| CCTV (inc. security cabinets, gate intercoms) | Broadcast and wireless communications equipment SE | USA |  | 2620 US$/kg | US | Average - NAICS sector 334220 |
| Steel Containment (ladders, trays, trunking) | Steel hot-dip galvanised, cradle to gate | ws | x | x | 49 sites in 17 countries | Average |
| **Fabrication of containment** | Steel product manufacturing, average metal working | Eco | x | x | RER | Average |
| **Transport to fabrication** | Transport, lorry 16-32t, EURO4 | Eco | x | x | RER (DE) | Diesel |
| Distribution Boards | Switchgear and switchboard apparatus manufacturing SE | USA |  | 0.933 US$/kg | US | Average - NAICS sector 335313 |
| Freight Lifts | Elevators and moving stairways | USA IO |  | 71.9 US$/kg | US | Not specified |
| Gas Detection (Internal and External) | Watch, clock, and other measuring and controlling device manufacturing SE | USA |  | 480 US$/kg | US | Average - NAICS sector 334518 |
| Generator Sets (Generators + Day Tanks) | Motor and generator manufacturing SE | USA |  | 17.3 US$/kg | US | Average - NAICS sector 335312 |
| Lighting - Lights and Control Modules | Electric lamp bulb and part manufacturing SE | USA |  | 36.8 US$/kg | US | Average - NAICS sector 335110 |
| Lighting - Presence Detectors | Automatic environmental control manufacturing SE | USA |  | 318 US$/kg | US | Average - NAICS sector 334512 |
| Lighting - Switches | Other electronic component manufacturing SE | USA |  | 107 US$/kg | US | Average - NAICS sector 334419 |
| Lighting - Wiring | Cable, three-conductor cable, at plant | Eco |  | 1.04 kg/m | GLO (CH) | Data from one producer |
| Motor Control Centres | Relay and industrial control manufacturing SE | USA |  | 1.99 US$/kg | US | Average - NAICS sector 335314 |
| PDUs | Power, distribution, and specialty transformer manufacturing SE | USA |  | 12 US$/kg | US | Average - NAICS sector 335311 |
| Remote Power Panel | Power, distribution, and specialty transformer manufacturing SE | USA |  | 9.33 US$/kg | US | Average - NAICS sector 335311 |
| Ring Main Units (switchgear) | Switchgear and switchboard apparatus manufacturing SE | USA |  | 38.4 US$/kg | US | Average - NAICS sector 335313 |
| Small Power - Sockets | Wiring device manufacturing SE | USA |  | 57.9 US$/kg | US | Average - NAICS sector 33539(1) |
| Small Power - Fused Connections | Wiring device manufacturing SE | USA |  | 27.0 US$/kg | US | Average - NAICS sector 33539(1) |
| Switchboards | Switchgear and switchboard apparatus manufacturing SE | USA |  | 2.07 US$/kg | US | Average - NAICS sector 335313 |
| Transformers | Transformer, high voltage use, at plant | Eco | x | x | GLO | Average based on literature and assumptions |
| UPS (Modules, Cabinets, Advance Cabinets, Pulse Cabinets, System Bypass Modules) | All other miscellaneous electrical equipment and component manufacturing SE | USA |  | 31.8 US$/kg | US | Average - NAICS sector 335999 |
| UPS Batteries | Storage battery manufacturing SE | USA |  | 0.675 US$/kg | US | Average - NAICS sector 335911 |
| UPS Battery Chargers | All other miscellaneous electrical equipment and component manufacturing SE | USA |  | 92.3 US$/kg | US | Average - NAICS sector 335999 |

Processes used to model the **PH infrastructure** (49 sites in 17 countries includes: CN, IN, JP, US, RLA, RER)

| **Component** | **Process** | **Library** | **Non Mass** | **Conversion** | **Coverage of System Boundaries** | |
| --- | --- | --- | --- | --- | --- | --- |
| **Geographical** | **Technological** |
| Domestic Water | Heating equipment (except warm air furnaces) manufacturing SE | USA |  | 17.3 US$/kg | US | Average - NAICS sector 333414 |
| Leak Detection Tracing | Watch, clock, and other measuring and controlling device manufacturing SE | USA |  | 485 US$/kg | US | Average - NAICS sector 334518 |
| Pipes (PVC) | PVC pipe E | Id 2.0 | x | x | RER, western | Average |
| Pipes (Steel) | Steel welded pipes, cradle to gate | ws | x | x | 49 sites in 17 countries | Average |
| Process Water Servcies | Other commercial and service industry machinery manufacturing SE | USA |  | 2.57 US$/kg | US | Average - NAICS sector 333319 |
| RWH (Pipes - H/M/LDPE) | HDPE pipes E | Id 2.0 | x | x | RER, western | Average |
| RWH RC Concrete | Concrete, normal, at plant | Eco |  | 2380 kg/m3 | CH | Average |
| RWH RC Reinforcement Steel | Reinforcement steel, cradle to gate | ws | x | x | 49 sites in 17 countries | Average |
| RWH Steel Accessories | Steel Plate, cradle to gate | ws | x | x | 49 sites in 17 countries | Average |
| **Fabrication of steel accessories** | Steel product manufacturing, average metal working | Eco | x | x | RER | Average |
| **Transport to fabrication** | Transport, lorry 16-32t, EURO4 | Eco | x | x | RER (DE) | Diesel |
| RWH Tanks, Sumps, Pumps | Metal tank (heavy gauge) manufacturing SE | USA |  | 7.17 US$/kg | US | Average - NAICS sector 332420 |
| Soil and Waste Drainage | Pump and pumping equipment manufacturing SE | USA |  | 353 US$/kg | US | Average - NAICS sector 333911 |

Processes used to model the **FIRE infrastructure**

| **Component** | **Process** | **Library** | **Non Mass** | **Conversion** | **Coverage of System Boundaries** | |
| --- | --- | --- | --- | --- | --- | --- |
| **Geographical** | **Technological** |
| Fire System | Other communications equipment manufacturing SE | USA |  | 891 US$/kg | US | Average - NAICS sector 334290 |
| Pipes (PVC) | PVC pipe E | Id 2.0 | x | x | RER, western | Average |

Processes used to model the **EXTERNAL infrastructure**

| **Component** | **Process** | **Library** | **Non Mass** | **Conversion** | **Coverage of System Boundaries** | |
| --- | --- | --- | --- | --- | --- | --- |
| **Geographical** | **Technological** |
| Ethernet Cable | Cable, network cable, category 5, without plugs, at plant | Eco |  | 0.0036 kg/m | GLO | Wire drawing (Copper), plastic extrusion (LDPE, PVC), tin coating. |
| Power Cable | Cable, three-conductor cable, at plant | Eco |  | 1.04 kg/m | GLO (CH) | Data from one producer |
| Ducts (H/M/LDPE) | HDPE pipes E | Id 2.0 | x | x | RER, western | Average |
| Ducts (PVC) | PVC pipe E | Id 2.0 | x | x | RER, western | Average |
| Pipes (Copper) | Cathode, copper, primary copper production | Eco | x | x | GLO | Average - Electrorefining of copper anode |
| **Fabrication of copper pipes** | Copper product manufacturing, average metal working | Eco | x | x | RER | Average |
| **Transport of copper to fabrication** | Transport, lorry 16-32t, EURO4 | Eco | x | x | RER (DE) | Diesel |
| Pipes (H/M/LDPE) | HDPE pipes E | Id 2.0 | x | x | RER, western | Average |
| Pipes (PVC) | PVC pipe E | Id 2.0 | x | x | RER, western | Average |
| Sewers (RC Concrete) | Concrete, normal, at plant | Eco |  | 2380 kg/m3 | CH | Average |
| Sewers (RC Reinforcement Steel) | Reinforcement steel, cradle to gate | ws | x | x | 49 sites in 17 countries: CN, IN, JP, US, RLA, RER | Average |

Processes used to model the **STRUCTURAL infrastructure** (49 sites in 17 countries includes: CN, IN, JP, US, RLA, RER)

| **Component** | **Process** | **Library** | **Non Mass** | **Conversion** | **Coverage of System Boundaries** | |
| --- | --- | --- | --- | --- | --- | --- |
| **Geographical** | **Technological** |
| Aluminium (Al) | Aluminium, primary, at plant | Eco | x | x | RER | Average |
| **Fabrication of Al products** | Aluminium product manufacturing, average metal working | Eco | x | x | RER | Average |
| **Transport of Al to fabrication** | Transport, lorry 16-32t, EURO4 | Eco | x | x | RER (DE) | Diesel |
| Plywood | Plywood, at plywood plant | USLCI | x | x | US | Typical |
| Blockwork Wall (Blockwork) | Concrete block, at plant | Eco | x | x | DE | Normal concrete, typical technology |
| Blockwork Wall (Mortar) | Cement mortar, at plant | Eco | x | x | CH | Average current technology |
| Blockwork Wall (Water) | Tap water, at user | Eco | x | x | RER | Example of a waterworks in CH |
| Damp Proof Membrane | LDPE, Resin | Eco | x | x | RER, western | Average |
| **Fabrication of DPM** | Extrusion, plastic film | Eco | x | x | RER | Present technologies |
| **Transport of LDPE to fabrication** | Transport, lorry 16-32t, EURO4 | Eco | x | x | RER (DE) | Diesel |
| Doors (single = 1, double = 2) | Door, inner, glass-wood, at plant | Eco |  | 27.6 kg/m2 | RER (CH) | Average |
| Glass Fibre Insulation | Glass wool mat, at plant | Eco | x | x | CH | High technical level but pre-1995 |
| Gravel (Limestone) | Limestone, crushed, for mill | Eco | x | x | CH | Technically high level: heavy machines (excluding building machines) are operated electrically; air is recirculated in closed-loop to avoid dust emissions |
| Linoleum | Hard surface flooring coverings | USA IO |  | 2.1 US$/kg | US | Not specified |
| Linoleum Plywood | Plywood, at plywood plant | USLCI | x | x | US | Typical |
| Paint | Alkyd paint, white, 60% in H2O, at plant | Eco | x | x | RER | Physical mixing of resin, water and pigments |
| Precast Concrete | Precast Concrete, min reinforcement, prod. mix, concrete type C20/C25, w/o consideration of casings | ELCD | x | x | RER | Current national standard |
| Raised Floor (Steel pedestal & stringers) | steel sections, cradle to gate | ws | x | x | 49 sites in 17 countries | Average |
| Raised Floor (Particle Board) | Particle board, P5 (V100), production mix, at plant, 7,8% water content EU-27 S | ELCD | x | x | RER | Chipping of wood; drying and glueing of chips; moulding into a mat and pressed; cut/sawn into final shape and sanded |
| Raised Floor (ABS) | Acrylonitrile-butadiene-styrene copolymer, ABS, at plant | Eco | x | x | RER |  |
| **Fabrication of RF** | Laminating, foil, with acrylic binder | Eco |  | N/A | RER | Approximation from data of lamination of packaging foils. Acrylic glue as binder assumed. |
| **Transport to RF fabrication** | Transport, lorry 16-32t, EURO4 | Eco | x | x | RER (DE) | Diesel |
| RC (Concrete) | Concrete, normal, at plant | Eco |  | 2380 kg/m3 | CH | Average |
| RC (Reinforcement Steel) | Reinforcement steel, cradle to gate | ws | x | x | 49 sites in 17 countries | Average |
| Sand | Sand, at mine | Eco | x | x | CH | Typical |
| Steel | steel sections, cradle to gate | ws | x | x | 49 sites in 17 countries | Average |
| SCT (Polyester Powder Coating) | Powder coating, steel sheet | Eco |  | 0.625 kg/m2 | RER | Technology: Phosphating, coating and heat curing. Treatment of the waste water is assumed. |
| SCT (Steel) | Steel Plate, cradle to gate | ws | x | x | 49 sites in 17 countries | Average |
| SCT (Glass Fibre Insulation) | Glass wool mat, at plant | Eco | x | x | CH | High technical level but pre-1995 |
| **Fabrication of SCT** | Steel product manufacturing, average metal working | Eco | x | x | RER | Average |
| **Transport to SCT fabrication** | Transport, lorry 16-32t, EURO4 | Eco | x | x | RER (DE) | Diesel |
| Wall Covering (Gypsum Plasterboard) | Gypsum Plaster board, at plant | Eco | x | x | CH | Average |
| Wall Covering (Plaster) | Thermal plaster, at plant | Eco | x | x | CH | Average current technology |
| Wall Covering (Water) | Tap water, at user | Eco | x | x | RER | Example of a waterworks in CH |

##### Modelling ASSUMPTIONS – End-Of-Life

Processes used to model the **end-of-life** for the **IT infrastructure** and any assumptions/modifications made

| **Component** | **EOL** | **Process** | **Library** | **Coverage of System Boundaries** | | **Assumptions/Modifications** |
| --- | --- | --- | --- | --- | --- | --- |
| **Geographical** | **Technological** |
| Ethernet Cable | WEEE | DC Disposal, treatment of cables | Eco (alt) | GLO (CH) | Shredder, followed by modern grinding machine with current separation technology. | **Added IfT:** 50 km transport from waste transfer station (WTS) to end treatment.  **Included**: Transport to the WTS assumed included. |
| Cold Aisle Containment | L | DC Disposal, building, reinforcement steel, to final disposal | Eco (alt) | CH | Diesel (transport)  Landfill with renaturation after closure. 50% of the sites feature a base seal and leachate collection system. | Disposal of reinforcement steel used as a proxy for all steel products.  **Deleted:** Impacts of dismantling (energy and particulates). **Added IfT:** 50 km transport from WTS to end treatment. |
|  | R | DC Recycling Steel and Iron | Eco (alt) | RER (CH) | Diesel (transport) | Empty process originally  **Added IfT:** 0.015 tkm transport to WTS (same as construction processes).  **Added IfT:** 50 km transport from WTS to end treatment. |
| Networking | WEEE | DC Disposal, industrial devices, to WEEE treatment | Eco (alt) | CH | Current mix of manual and mechanical treatment | **Added IfT:** 0.015 tkm transport to WTS (same as construction processes).  **Added IfT:** 50 km transport from WTS to end treatment. |
| Racks | R+R | DC Recycling Cabinets | Eco (com) | RER (CH) | Diesel (transport) | New process made up of Ecoinvent processes. **Added IfT:** 0.015 tkm transport to WTS (same as construction processes).  **Added IfT:** 50 km transport from WTS to end treatment. |
| Servers | WEEE | DC Disposal_Servers_ Storage | Eco (com) | RER (CH) | Diesel (transport) Current mix of manual and mechanical treatment (disposal of computer) | New process made up of Ecoinvent processes. **Added IfT:** 0.015 tkm transport to WTS (same as construction processes).  **Added IfT:** 50 km transport from WTS to end treatment **Added OtT:** Disposal, desktop computer, to WEEE treatment (CH) 0.0885 p/kg of the disposal (1 p = 11.3 kg) |
| Storage | WEEE | DC Disposal_Servers_ Storage | Eco (com) | RER (CH) | Diesel (transport) Current mix of manual and mechanical treatment (disposal of computer) | New process made up of Ecoinvent processes. **Added IfT:** 0.015 tkm transport to WTS (same as construction processes).  **Added IfT:** 50 km transport from WTS to end treatment **Added OtT:** Disposal, desktop computer, to WEEE treatment (CH) 0.0885 p/kg of the disposal (1 p = 11.3 kg) |

Processes used to model the **end-of-life** for the **MECHANICAL infrastructure** and any assumptions/modifications made

| **Component** | **EOL** | **Process** | **Library** | **Coverage of System Boundaries** | | **Assumptions/Adaptations** |
| --- | --- | --- | --- | --- | --- | --- |
| **Geographical** | **Technological** |
| Battery Cooling | R+R | DC Recycling Battery Cooling | Eco (com) | RER (CH) | Diesel (transport) | New process made up of Ecoinvent processes. **Added IfT:** 0.015 tkm transport to WTS (same as construction processes).  **Added IfT:** 50 km transport from WTS to end treatment |
| Chilled Water System | R+R | DC Recycling Chilled Water | Eco (com) | RER (CH) | Diesel (transport) | New process made up of Ecoinvent processes. **Added IfT:** 0.015 tkm transport to WTS (same as construction processes).  **Added IfT:** 50 km transport from WTS to end treatment. |
| Condenser Water System | R+R | DC Recycling Condenser Water | Eco (com) | RER (CH) | Diesel (transport) | New process made up of Ecoinvent processes. **Added IfT:** 0.015 tkm transport to WTS (same as construction processes).  **Added IfT:** 50 km transport from WTS to end treatment. |
| Ductwork (Steel) | L | DC Disposal, building, reinforcement steel, to final disposal | Eco (alt) | CH | Diesel (transport)  Landfill with renaturation after closure. 50% of the sites feature a base seal and leachate collection system. | Disposal of reinforcement steel used as a proxy for all steel products.  **Deleted:** Impacts of dismantling (energy and particulates). **Added IfT:** 50 km transport from WTS to end treatment. |
|  | R | DC Recycling Steel and Iron | Eco (alt) | RER (CH) | Diesel (transport) | Empty process originally. **Added IfT:** 0.015 tkm transport to WTS (same as construction processes).  **Added IfT:** 50 km transport from WTS to end treatment. |
| Free Cooling System | R+R | DC Recycling Free Cooling | Eco (com) | RER (CH) | Diesel (transport) | New process made up of Ecoinvent processes. **Added IfT:** 0.015 tkm transport to WTS (same as construction processes).  **Added IfT:** 50 km transport from WTS to end treatment. |
| Mineral Wool Insulation | L | DC Disposal, building, mineral wool, to final disposal | Eco (alt) | CH | Diesel (transport)  Landfill with renaturation after closure. 50% of the sites feature a base seal and leachate collection system. | Altered Ecoinvent process. **Added IfT:** 0.015 tkm transport to WTS (same as construction processes).  **Added IfT**: 50 km transport from WTS to end treatment.  **Deleted:** particulate emissions from dismantling. |
|  | R | DC Disposal, building, mineral wool, to recycling | Eco (alt) | CH | Diesel (transport) | Altered Ecoinvent process. **Added IfT:** 0.015 tkm transport to WTS (same as final disposal above).  **Added IfT:** 50 km transport from WTS to end treatment.  **Deleted**: particulate emissions from dismantling. |
| Motorised Control Dampers | R+R | DC Recycling MCD | Eco (com) | RER (CH) | Diesel (transport) | New process made up of Ecoinvent processes  **Added IfT:** 0.015 tkm transport to WTS (same as construction processes).  **Added IfT:** 50 km transport from WTS to end treatment. |
| Pipes (Copper) | R | DC Recycling Copper | Eco (com) | RER (CH) | Diesel (transport) | New process made up of Ecoinvent processes  **Added IfT:** 0.015 tkm transport to WTS (same as construction processes).  **Added IfT:** 50 km transport from WTS to end treatment. |
| Pipes (Plastic - PVC, ABS, MDPE, HDPE) | L | Disposal, building, polyvinylchloride products, to final disposal | Eco (modified) | CH | Diesel (transport)  Municipal sanitary landfill for biogenic or untreated municipal waste (reactive organic landfill). Landfill gas and leachate collection system. Recultivation and monitoring for 150 years after closure (disposal) | **Added IfT:** 50 km transport from WTS to end treatment  **Included:** Transport to the WTS assumed included **Changed OtT:** Disposal, polyvinylchloride, 0.2% water, to municipal incineration/CH U **TO:** Disposal, polyvinylchloride, 0.2% water, to sanitary landfill/CH U |
|  | R | Disposal, building, polyvinylchloride products, to final disposal | Eco (alt) | CH | Diesel (transport) | **Added IfT:** 50 km transport from WTS to end treatment. **Included:** Transport to the WTS assumed included. **Deleted OtT:** Disposal, polyvinylchloride, 0.2% water, to municipal incineration/CH U |
| Pipes (Steel) | L | DC Disposal, building, reinforcement steel, to final disposal | Eco (alt) | CH | Diesel (transport)  Landfill with renaturation after closure. 50% of the sites feature a base seal and leachate collection system | Disposal of reinforcement steel used as a proxy for all steel products.  **Removed:** Impacts of dismantling. **Added IfT:** 50 km transport from WTS to end treatment. |
|  | R | DC Recycling Steel and Iron | Eco (alt) | RER (CH) | Diesel (transport) | Empty process originally.  **Added IfT:** 0.015 tkm transport to WTS (same as construction processes).  **Added IfT:** 50 km transport from WTS to end treatment. |
| Pressurisation | R+R | DC Recycling Comms Pressurisation | Eco (com) | RER (CH) | Diesel (transport) | New process made up of Ecoinvent processes.  **Added IfT:** 0.015 tkm transport to WTS (same as construction processes).  **Added IfT:** 50 km transport from WTS to end treatment. |
| Radiant Heaters | R+R | DC Recycling Radiant Heaters | Eco (com) | RER (CH) | Diesel (transport) | New process made up of Ecoinvent processes.  **Added IfT:** 0.015 tkm transport to WTS (same as construction processes).  **Added IfT:** 50 km transport from WTS to end treatment. |
| Ventilation | R+R | DC Recycling Ventilation | Eco (com) | RER (CH) | Diesel (transport) | New process made up of Ecoinvent processes. **Added IfT:** 0.015 tkm transport to WTS (same as construction processes).  **Added IfT:** 50 km transport from WTS to end treatment. |

Processes used to model the **end-of-life** for the **ELECTRICAL infrastructure** and any assumptions/modifications made

| **Component** | **EOL** | **Process** | **Library** | **Coverage of System Boundaries** | | **Assumptions/Adaptations** |
| --- | --- | --- | --- | --- | --- | --- |
| **Geographical** | **Technological** |
| BMS | R+R | DC Recycling BMS | Eco (com) | RER (CH) | Diesel (transport) | New process made up of Ecoinvent processes.  **Added IfT:** 0.015 tkm transport to WTS (same as construction processes).  **Added IfT:** 50 km transport from WTS to end treatment. |
| BF Power Cable | WEEE | DC Disposal, treatment of cables | Eco (alt) | GLO (CH) | Shredder, followed by modern grinding machine with current separation technology | **Added IfT:** 50 km transport from waste transfer station (WTS) to end treatment.  **Included**: Transport to the WTS assumed included. |
| BF Pea Shingle | L | DC Disposal, building, concrete gravel, to final disposal | Eco (alt) | CH | Diesel (transport) | Altered Ecoinvent process.  **Deleted:** Energy consumption for, and particulate emissions from demolition.  **Added IfT:** 50 km transport from WTS to end treatment |
|  | R | DC Disposal, building, concrete gravel, to recycling | Eco (alt) | CH | Diesel (transport) | Altered Ecoinvent process.  **Deleted:** Energy consumption for, and particulate emissions from demolition.  **Added IfT:** 0.015 tkm transport to WTS (same as landfill process above).  **Added IfT:** 50 km transport from WTS to end treatment. |
| BF Pipework (Steel) | L | DC Disposal, building, reinforcement steel, to final disposal | Eco (alt) | CH | Diesel (transport)  Landfill with renaturation after closure. 50% of the sites feature a base seal and leachate collection system | Disposal of reinforcement steel used as a proxy for all steel products.  **Deleted:** Impacts of dismantling (energy and particulates). **Added IfT:** 50 km transport from WTS to end treatment. |
|  | R | DC Recycling Steel and Iron | Eco (alt) | RER (CH) | Diesel (transport) | Empty process originally. **Added IfT:** 0.015 tkm transport to WTS (same as construction processes).  **Added IfT:** 50 km transport from WTS to end treatment |
| BF RC Concrete | L | DC Disposal, building, concrete, not reinforced, to final disposal | Eco (alt) | CH | Diesel (transport)  Landfill with renaturation after closure. 50% of the sites feature a base seal and leachate collection system | Altered Ecoinvent process.  **Deleted:** Impacts of dismantling (energy and particulates).  **Added IfT:** 50 km transport from WTS to end treatment. |
|  | R | DC Disposal, building, concrete, not reinforced, to recycling | Eco (alt) | CH | Diesel (transport) | Altered Ecoinvent process.  **Deleted:** Impacts of dismantling (energy and particulates). **Added IfT:** 0.015 tkm transport from WTS to end treatment (same as landfill above) **Added IfT:** 50 km transport from WTS to end treatment. |
| BF RC Reinforcement Steel | L | DC Disposal, building, reinforcement steel, to final disposal | Eco (alt) | CH | Diesel (transport)  Landfill with renaturation after closure. 50% of the sites feature a base seal and leachate collection system | Disposal of reinforcement steel used as a proxy for all steel products.  **Deleted:** Impacts of dismantling (energy and particulates). **Added IfT:** 50 km transport from WTS to end treatment. |
|  | R | DC Recycling Steel and Iron | Eco (alt) | RER (CH) | Diesel (transport) | Empty process originally. **Added IfT:** 0.015 tkm transport to WTS (same as construction processes).  **Added IfT:** 50 km transport from WTS to end treatment. |
| BF Tanks (control, alarms, LCD) | R+R | DC Recycling Bulk Fuel Tanks | Eco (com) | RER (CH) | Diesel (transport) | New process made up of Ecoinvent processes.  **Added IfT:** 0.015 tkm transport to WTS (same as construction processes).  **Added IfT:** 50 km transport from WTS to end treatment. |
| BF Transfer Pumps | R+R | DC Recycling Bulk Fuel Pumps | Eco (com) | RER (CH) | Diesel (transport) | New process made up of Ecoinvent processes.  **Added IfT:** 0.015 tkm transport to WTS (same as construction processes).  **Added IfT:** 50 km transport from WTS to end treatment. |
| Power Cable | WEEE | DC Disposal, treatment of cables | Eco (alt) | GLO (CH) | Shredder, followed by modern grinding machine with current separation technology | **Added IfT:** 50 km transport from waste transfer station (WTS) to end treatment.  **Included**: Transport to the WTS assumed included. |
| CCTV (inc. security equipment cabinets and gate intercoms) | R+R | DC Recycling CCTV | Eco (com) | RER (CH) | Diesel (transport) | New process made up of Ecoinvent processes.  **Added IfT:** 0.015 tkm transport to WTS (same as construction processes).  **Added IfT:** 50 km transport from WTS to end treatment. |
| Steel Containment (ladders, trays, trunking) | L | DC Disposal, building, reinforcement steel, to final disposal | Eco (alt) | CH | Diesel (transport)  Landfill with renaturation after closure. 50% of the sites feature a base seal and leachate collection system | Disposal of reinforcement steel used as a proxy for all steel products.  **Deleted:** Impacts of dismantling (energy and particulates). **Added IfT:** 50 km transport from WTS to end treatment. |
|  | R | DC Recycling Steel and Iron | Eco (alt) | RER (CH) | Diesel (transport) | Empty process originally. **Added IfT:** 0.015 tkm transport to WTS (same as construction processes).  **Added IfT:** 50 km transport from WTS to end treatment. |
| Distribution Boards | R+R | DC Recycling Distribution Boards | Eco (com) | RER (CH) | Diesel (transport) | New process made up of Ecoinvent processes.  **Added IfT:** 0.015 tkm transport to WTS (same as construction processes).  **Added IfT:** 50 km transport from WTS to end treatment. |
| Freight Lifts | R+R | DC Recycling Freight Lifts | Eco (com) | RER (CH) | Diesel (transport) | New process made up of Ecoinvent processes.  **Added IfT:** 0.015 tkm transport to WTS (same as construction processes).  **Added IfT:** 50 km transport from WTS to end treatment. |
| Gas Detection (Internal and External) | R+R | DC Recycling Gas Detection | Eco (com) | RER (CH) | Diesel (transport) | New process made up of Ecoinvent processes.  **Added IfT:** 0.015 tkm transport to WTS (same as construction processes).  **Added IfT:** 50 km transport from WTS to end treatment. |
| Generator Sets (Generators + Day Tanks) | R+R | DC Recycling Gen Sets | Eco (com) | RER (CH) | Diesel (transport) | New process made up of Ecoinvent processes.  **Added IfT:** 0.015 tkm transport to WTS (same as construction processes).  **Added IfT:** 50 km transport from WTS to end treatment. |
| Lighting - Lights and Control Modules | R+R | DC Recycling Lighting Lights | Eco (com) | RER (CH) | Diesel (transport) | New process made up of Ecoinvent processes  **Added IfT:** 0.015 tkm transport to WTS (same as construction processes).  **Added IfT:** 50 km transport from WTS to end treatment. |
| Lighting - Presence Detectors | R+R | DC Recycling Lighting Presence Detectors | Eco (com) | RER (CH) | Diesel (transport) | New process made up of Ecoinvent processes.  **Added IfT:** 0.015 tkm transport to WTS (same as construction processes).  **Added IfT:** 50 km transport from WTS to end treatment |
| Lighting - Switches | R+R | DC Recycling Lighting Switches | Eco (com) | RER (CH) | Diesel (transport) | New process made up of Ecoinvent processes.  **Added IfT:** 0.015 tkm transport to WTS (same as construction processes).  **Added IfT:** 50 km transport from WTS to end treatment. |
| Lighting - Wiring | WEEE | DC Disposal, treatment of cables | Eco (alt) | GLO (CH) | Shredder, followed by modern grinding machine with current separation technology | Altered Ecoinvent process.  **Added IfT:** 50 km transport from waste transfer station (WTS) to end treatment.  **Included**: Transport to the WTS assumed included. |
| Motor Control Centres | R+R | DC Recycling MCC | Eco (com) | RER (CH) | Diesel (transport) | New process made up of Ecoinvent processes.  **Added IfT:** 0.015 tkm transport to WTS (same as construction processes).  **Added IfT:** 50 km transport from WTS to end treatment. |
| PDUs | R+R | DC Recycling PDU | Eco (com) | RER (CH) | Diesel (transport) | New process made up of Ecoinvent processes.  **Added IfT:** 0.015 tkm transport to WTS (same as construction processes).  **Added IfT:** 50 km transport from WTS to end treatment. |
| Remote Power Panel | R+R | DC Recycling RPP | Eco (com) | RER (CH) | Diesel (transport) | New process made up of Ecoinvent processes.  **Added IfT:** 0.015 tkm transport to WTS (same as construction processes).  **Added IfT:** 50 km transport from WTS to end treatment. |
| Ring Main Units (switchgear) | R+R | DC Recycling RMU | Eco (com) | RER (CH) | Diesel (transport) | New process made up of Ecoinvent processes.  **Added IfT:** 0.015 tkm transport to WTS (same as construction processes).  **Added IfT:** 50 km transport from WTS to end treatment. |
| Small Power - Sockets | R+R | DC Recycling Small Power Sockets | Eco (com) | RER (CH) | Diesel (transport) | New process made up of Ecoinvent processes.  **Added IfT:** 0.015 tkm transport to WTS (same as construction processes).  **Added IfT:** 50 km transport from WTS to end treatment. |
| Small Power - Fused Connections | R+R | DC Recycling Small Power Fused Connections | Eco (com) | RER (CH) | Diesel (transport) | New process made up of Ecoinvent processes.  **Added IfT:** 0.015 tkm transport to WTS (same as construction processes).  **Added IfT:** 50 km transport from WTS to end treatment. |
| Switchboards | R+R | DC Recycling Switchboards | Eco (com) | RER (CH) | Diesel (transport) | New process made up of Ecoinvent processes.  **Added IfT:** 0.015 tkm transport to WTS (same as construction processes).  **Added IfT:** 50 km transport from WTS to end treatment. |
| Transformers | R+R | DC Recycling Transformers | Eco (com) | RER (CH) | Diesel (transport) | New process made up of Ecoinvent processes.  **Added IfT:** 0.015 tkm transport to WTS (same as construction processes).  **Added IfT:** 50 km transport from WTS to end treatment. |
| UPS (Modules, Cabinets, Advance Cabinets, Pulse Cabinets, System Bypass Modules) | R+R | DC Recycling UPS | Eco (com) | RER (CH) | Diesel (transport) | New process made up of Ecoinvent processes.  **Added IfT:** 0.015 tkm transport to WTS (same as construction processes).  **Added IfT:** 50 km transport from WTS to end treatment. |
| UPS Batteries | R+R | DC Recycling UPS Batteries | Eco (com) | RER (CH) | Diesel (transport) | New process made up of Ecoinvent processes. **Added IfT:** 0.015 tkm transport to WTS (same as construction processes).  **Added IfT:** 50 km transport from WTS to end treatment. |
| UPS Battery Chargers | R+R | DC Recycling UPS Battery Chargers | Eco (com) | RER (CH) | Diesel (transport) | New process made up of Ecoinvent processes. **Added IfT:** 0.015 tkm transport to WTS (same as construction processes).  **Added IfT:** 50 km transport from WTS to end treatment. |

Processes used to model the **end-of-life** for the **PH infrastructure** and any assumptions/modifications made

| **Component** | **EOL** | **Process** | **Library** | **Coverage of System Boundaries** | | **Assumptions/Adaptations** |
| --- | --- | --- | --- | --- | --- | --- |
| **Geographical** | **Technological** |
| Domestic Water | R+R | DC Recycling Domestic Water | Eco (com) | RER (CH) | Diesel (transport) | New process made up of Ecoinvent processes.  **Added IfT:** 0.015 tkm transport to WTS (same as construction processes).  **Added IfT:** 50 km transport from WTS to end treatment. |
| Leak Detection Tracing | R+R | DC Recycling Leak Detection Tracing | Eco (com) | RER (CH) | Diesel (transport) | New process made up of Ecoinvent processes. **Added IfT:** 0.015 tkm transport to WTS (same as construction processes).  **Added IfT:** 50 km transport from WTS to end treatment. |
| Pipes (PVC) | L | Disposal, building, polyvinylchloride products, to final disposal | Eco (alt) | CH | Diesel (transport)  Municipal sanitary landfill for biogenic or untreated municipal waste (reactive organic landfill). Landfill gas and leachate collection system. Recultivation and monitoring for 150 years after closure (disposal) | **Added IfT:** 50 km transport from WTS to end treatment. **Included:** Transport to the WTS assumed included. **Changed OtT:** Disposal, polyvinylchloride, 0.2% water, to municipal incineration/CH U **TO:** Disposal, polyvinylchloride, 0.2% water, to sanitary landfill/CH U |
|  | R | Disposal, building, polyvinylchloride products, to final disposal | Eco (alt) | CH | Diesel (transport) | **Added IfT:** 50 km transport from WTS to end treatment. **Included:** Transport to the WTS assumed included. **Deleted OtT:** Disposal, polyvinylchloride, 0.2% water, to municipal incineration/CH U |
| Pipes (Steel) | L | DC Disposal, building, reinforcement steel, to final disposal | Eco (alt) | CH | Diesel (transport)  Landfill with renaturation after closure. 50% of the sites feature a base seal and leachate collection system | Disposal of reinforcement steel used as a proxy for all steel products.  **Deleted:** Impacts of dismantling (energy and particulates). **Added IfT:** 50 km transport from WTS to end treatment. |
|  | R | DC Recycling Steel and Iron | Eco (alt) | RER (CH) | Diesel (transport) | Empty process originally. **Added IfT:** 0.015 tkm transport to WTS (same as construction processes).  **Added IfT:** 50 km transport from WTS to end treatment. |
| Process Water Servcies | R+R | DC Recycling Process Water Services | Eco (com) | RER (CH) | Diesel (transport) | New process made up of Ecoinvent processes.  **Added IfT:** 0.015 tkm transport to WTS (same as construction processes).  **Added IfT:** 50 km transport from WTS to end treatment. |
| RWH (Pipes - H/M/LDPE) | L | DC Landfill of plastic waste EU-27 | ELCD (alt) | EU-27 | Diesel (transport)  Typical municipal waste landfill with surface and basic sealing meeting European limits for emissions. Includes landfill gas treatment, leachate treatment, sludge treatment and deposition. | Ecoinvent process not used as burdens related to demolition were difficult to separate out.  **Added IfT:** 0.015 tkm transport to WTS (same as construction processes).  **Added IfT:** 50 km transport from WTS to end treatment. |
|  | R | DC Recycling PE | Eco (com) | RER (CH) | Diesel (transport) | Empty process originally. **Added IfT:** 0.015 tkm transport to WTS (same as construction processes).  **Added IfT:** 50 km transport from WTS to end treatment. |
| RWH RC Concrete | L | DC Disposal, building, concrete, not reinforced, to final disposal | Eco (alt) | CH | Diesel (transport)  Landfill with renaturation after closure. 50% of the sites feature a base seal and leachate collection system | Altered Ecoinvent process.  **Deleted:** Impacts of dismantling (energy and particulates). **Added IfT:** 50 km transport from WTS to end treatment. |
|  | R | DC Disposal, building, concrete, not reinforced, to recycling | Eco (alt) | CH | Diesel (transport) | Altered Ecoinvent process.  **Deleted:** Impacts of dismantling (energy and particulates). **Added IfT:** 0.015 tkm transport from WTS to end treatment (same as landfill above). **Added IfT:** 50 km transport from WTS to end treatment. |
| RWH RC Reinforcement Steel | L | DC Disposal, building, reinforcement steel, to final disposal | Eco (alt) | CH | Diesel (transport)  Landfill with renaturation after closure. 50% of the sites feature a base seal and leachate collection system | Disposal of reinforcement steel used as a proxy for all steel products.  **Deleted:** Impacts of dismantling (energy and particulates). **Added IfT:** 50 km transport from WTS to end treatment. |
|  | R | DC Recycling Steel and Iron | Eco (alt) | RER (CH) | Diesel (transport) | Empty process originally  **Added IfT**: 0.015 tkm transport to WTS (same as construction processes).  **Added IfT:** 50 km transport from WTS to end treatment. |
| RWH Steel Accessories | L | DC Disposal, building, reinforcement steel, to final disposal | Eco (alt) | CH | Diesel (transport)  Landfill with renaturation after closure. 50% of the sites feature a base seal and leachate collection system | Disposal of reinforcement steel used as a proxy for all steel products.  **Deleted:** Impacts of dismantling (energy and particulates). **Added IfT:** 50 km transport from WTS to end treatment. |
|  | R | DC Recycling Steel and Iron | Eco (alt) | RER (CH) | Diesel (transport) | Empty process originally  **Added IfT:** 0.015 tkm transport to WTS (same as construction processes).  **Added IfT:** 50 km transport from WTS to end treatment. |
| RWH Tanks, Sumps, Pumps | R+R | DC Recycling RWH Tanks | Eco (com) | RER (CH) | Diesel (transport) | New process made up of Ecoinvent processes. **Added IfT:** 0.015 tkm transport to WTS (same as construction processes).  **Added IfT:** 50 km transport from WTS to end treatment. |
| Soil and Waste Drainage | R+R | DC Recycling Soil and Waste Drainage | Eco (com) | RER (CH) | Diesel (transport) | New process made up of Ecoinvent processes. **Added IfT:** 0.015 tkm transport to WTS (same as construction processes).  **Added IfT:** 50 km transport from WTS to end treatment. |

Processes used to model the **end-of-life** for the **FIRE infrastructure** and any assumptions/modifications made.

| **Component** | **EOL** | **Process** | **Library** | **Coverage of System Boundaries** | | **Assumptions/Adaptations** |
| --- | --- | --- | --- | --- | --- | --- |
| **Geographical** | **Technological** |
| Fire System | R+R | DC Recycling Fire System | Eco (com) | RER (CH) | Diesel (transport) | New process made up of Ecoinvent processes.  **Added IfT:** 0.015 tkm transport to WTS (same as construction processes).  **Added IfT:** 50 km transport from WTS to end treatment. |
| Pipes (PVC) | L | Disposal, building, polyvinylchloride products, to final disposal | Eco (modified) | CH | Diesel (transport)  Municipal sanitary landfill for biogenic or untreated municipal waste (reactive organic landfill). Landfill gas and leachate collection system. Recultivation and monitoring for 150 years after closure (disposal) | **Added IfT:** 50 km transport from WTS to end treatment. **Included:** Transport to the WTS assumed included. **Changed OtT:** Disposal, polyvinylchloride, 0.2% water, to municipal incineration/CH U **TO:** Disposal, polyvinylchloride, 0.2% water, to sanitary landfill/CH U |
|  | R | Disposal, building, polyvinylchloride products, to final disposal | Eco (modified) | CH | Diesel (transport) | **Added IfT:** 50 km transport from WTS to end treatment. **Included:** Transport to the WTS assumed included. **Deleted OtT:** Disposal, polyvinylchloride, 0.2% water, to municipal incineration/CH U |

Processes used to model the **end-of-life** for the **EXTERNAL infrastructure** and any assumptions/modifications made.

| **Component** | **EOL** | **Process** | **Library** | **Coverage of System Boundaries** | | **Assumptions/Adaptations** |
| --- | --- | --- | --- | --- | --- | --- |
| **Geographical** | **Technological** |
| Ethernet Cable | WEEE | DC Disposal, treatment of cables | Eco (alt) | GLO (CH) | Shredder, followed by modern grinding machine with current separation technology | **Added IfT:** 50 km transport from waste transfer station (WTS) to end treatment.  **Included**: Transport to the WTS assumed included. |
| Power Cable | WEEE | DC Disposal, treatment of cables | Eco (alt) | GLO (CH) | Shredder, followed by modern grinding machine with current separation technology | **Added IfT:** 50 km transport from waste transfer station (WTS) to end treatment.  **Included**: Transport to the WTS assumed included. |
| Ducts (H/M/LDPE) | L | DC Landfill of plastic waste EU-27 | ELCD (alt) | EU-27 | Diesel (transport)  Typical municipal waste landfill with surface and basic sealing meeting European limits for emissions. Includes landfill gas treatment, leachate treatment, sludge treatment and deposition. | Ecoinvent process not used as burdens related to demolition were difficult to separate out.  **Added IfT:** 0.015 tkm transport to WTS (same as construction processes).  **Added IfT:** 50 km transport from WTS to end treatment. |
|  | R | DC Recycling PE | Eco (com) | RER (CH) | Diesel (transport) | Empty process originally.  **Added IfT:** 0.015 tkm transport to WTS (same as construction processes).  **Added IfT:** 50 km transport from WTS to end treatment. |
| Ducts (PVC) | L | Disposal, building, polyvinylchloride products, to final disposal | ELCD (alt) | CH | Diesel (transport)  Municipal sanitary landfill for biogenic or untreated municipal waste (reactive organic landfill). Landfill gas and leachate collection system. Recultivation and monitoring for 150 years after closure (disposal) | **Added IfT:** 50 km transport from WTS to end treatment. **Included:** Transport to the WTS assumed included. **Changed OtT:** Disposal, polyvinylchloride, 0.2% water, to municipal incineration/CH U **TO:** Disposal, polyvinylchloride, 0.2% water, to sanitary landfill/CH U |
|  | R | Disposal, building, polyvinylchloride products, to final disposal | ELCD (alt) | CH | Diesel (transport) | **Added IfT:** 50 km transport from WTS to end treatment. **Included:** Transport to the WTS assumed included. **Deleted OtT:** Disposal, polyvinylchloride, 0.2% water, to municipal incineration/CH U |
| Pipes (Copper) | R | DC Recycling Copper | Eco (com) | RER (CH) | Diesel (transport) | New process made up of Ecoinvent processes.  **Added IfT:** 0.015 tkm transport to WTS (same as construction processes).  **Added IfT:** 50 km transport from WTS to end treatment |
| Pipes (H/M/LDPE) | L | DC Landfill of plastic waste EU-27 | ELCD (alt) | EU-27 | Diesel (transport)  Typical municipal waste landfill with surface and basic sealing meeting European limits for emissions. Includes landfill gas treatment, leachate treatment, sludge treatment and deposition. | Ecoinvent process not used as burdens related to demolition were difficult to separate out.  **Added IfT:** 0.015 tkm transport to WTS (same as construction processes).  **Added IfT:** 50 km transport from WTS to end treatment. |
|  | R | DC Recycling PE | Eco (com) | RER (CH) | Diesel (transport) | Empty process originally  **Added IfT:** 0.015 tkm transport to WTS (same as construction processes).  **Added IfT:** 50 km transport from WTS to end treatment. |
| Pipes (PVC) | L | Disposal, building, polyvinylchloride products, to final disposal | ELCD (alt) | CH | Diesel (transport)  Municipal sanitary landfill for biogenic or untreated municipal waste (reactive organic landfill). Landfill gas and leachate collection system. Recultivation and monitoring for 150 years after closure (disposal) | **Added IfT:** 50 km transport from WTS to end treatment. **Included:** Transport to the WTS assumed included. **Changed OtT:** Disposal, polyvinylchloride, 0.2% water, to municipal incineration/CH U **TO:** Disposal, polyvinylchloride, 0.2% water, to sanitary landfill/CH U |
|  | R | Disposal, building, polyvinylchloride products, to final disposal | ELCD (alt) | CH | Diesel (transport) | **Added IfT:** 50 km transport from WTS to end treatment. **Included:** Transport to the WTS assumed included. **Deleted OtT:** Disposal, polyvinylchloride, 0.2% water, to municipal incineration/CH U |
| Sewers (RC Concrete) | L | DC Disposal, building, concrete, not reinforced, to final disposal | Eco (alt) | CH | Diesel (transport)  Landfill with renaturation after closure. 50% of the sites feature a base seal and leachate collection system | Altered Ecoinvent process.  **Deleted:** Impacts of dismantling (energy and particulates). **Added IfT:** 50 km transport from WTS to end treatment. |
|  | R | DC Disposal, building, concrete, not reinforced, to recycling | Eco (alt) | CH | Diesel (transport) | Altered Ecoinvent process.  **Deleted:** Impacts of dismantling (energy and particulates). **Added IfT:** 0.015 tkm transport from WTS to end treatment (same as landfill above). **Added IfT:** 50 km transport from WTS to end treatment. |
| Sewers (RC Reinforcement Steel) | L | DC Disposal, building, reinforcement steel, to final disposal | Eco (alt) | CH | Diesel (transport)  Landfill with renaturation after closure. 50% of the sites feature a base seal and leachate collection system | Disposal of reinforcement steel used as a proxy for all steel products.  **Removed:** Impacts of dismantling (energy and particulates). **Added IfT:** 50 km transport from WTS to end treatment. |
|  | R | DC Recycling Steel and Iron | Eco (alt) | RER (CH) | Diesel (transport) | Empty process originally  **Added IfT:** 0.015 tkm transport to WTS (same as construction processes).  **Added IfT:** 50 km transport from WTS to end treatment. |

Processes used to model the **end-of-life** for the **STRUCTURAL infrastructure** and any assumptions/modifications made.

| **Component** | **EOL** | **Process** | **Library** | **Coverage of System Boundaries** | | **Assumptions/Adaptations** |
| --- | --- | --- | --- | --- | --- | --- |
| **Geographical** | **Technological** |
| Aluminium | L | DC Disposal, aluminium, 0% water, to sanitary landfill | Eco (alt) | CH | Diesel (transport)  Swiss municipal sanitary landfill for biogenic or untreated municipal waste ('reactive organic landfill'). Landfill gas leachate collection system. Recultivation and monitoring for 150 years after closure. | Altered Ecoinvent process.  **Included:** Transport to the WTS assumed included. **Added IfT:** 50 km transport from WTS to end treatment. |
|  | R | DC Recycling Aluminium | Eco (alt) | RER (CH) | Diesel (transport) | Empty process originally  **Added IfT:** 0.015 tkm transport to WTS (same as construction processes).  **Added IfT:** 50 km transport from WTS to end treatment. |
| Plywood | L | DC Disposal, building, waste wood, untreated, to final disposal | Eco (alt) | CH | Diesel (transport)  Swiss municipal sanitary landfill for biogenic or untreated municipal waste ('reactive organic landfill'). Landfill gas leachate collection system. Recultivation and monitoring for 150 years after closure. | Altered Ecoinvent process **Added IfT:** 50 km transport from WTS to end treatment. **Changed OtT:** Disposal, wood untreated, 20% water, to municipal incineration/CH U **TO:** Disposal, wood untreated, 20% water, to sanitary landfill/CH U |
|  | R | DC Recycling Disposal, building, waste wood, untreated, to final disposal | Eco (alt) | CH | Diesel (transport) | Altered Ecoinvent process. **Added IfT:** 50 km transport from WTS to end treatment. **Deleted OtT:** Disposal, wood untreated, 20% water, to municipal incineration/CH U |
| Blockwork Wall (Blockwork) | L | DC Disposal, building, concrete, not reinforced, to final disposal | Eco (alt) | CH | Diesel (transport)  Landfill with renaturation after closure. 50% of the sites feature a base seal and leachate collection system | Altered Ecoinvent process. **Deleted:** Impacts of dismantling (energy and particulates). **Added IfT:** 50 km transport from WTS to end treatment. |
|  | R | DC Disposal, building, concrete, not reinforced, to recycling | Eco (alt) | CH | Diesel (transport) | Altered Ecoinvent process. **Deleted:** Impacts of dismantling (energy and particulates). **Added IfT:** 0.015 tkm transport from WTS to end treatment (same as landfill above). **Added IfT:** 50 km transport from WTS to end treatment. |
| Blockwork Wall (Mortar inc. Water) | L | DC Disposal, building, cement (in concrete) and mortar, to final disposal | Eco (alt) | CH | Diesel (transport)  Landfill with renaturation after closure. 50% of the sites feature a base seal and leachate collection system | Altered Ecoinvent process. **Deleted:** Impacts of dismantling (energy and particulates). **Included:** Transport to the WTS assumed included. **Added IfT:** 50 km transport from WTS to end treatment. |
|  | R | DC Recycling Disposal, building, cement (in concrete) and mortar, to final disposal | Eco (alt) | CH | Diesel (transport) | Altered Ecoinvent process. **Deleted:** Impacts of dismantling (energy and particulates).  **Included:** Transport to the WTS assumed included. **Added IfT**: 50 km transport from WTS to end treatment. **Deleted OtT:** disposal, inert waste, 5% water to inert material landfill. |
| Damp Proof Membrane | L | DC Disposal, building, polyethylene/polypropylene products, to final disposal | Eco (alt) | CH | Diesel (transport)  Swiss municipal sanitary landfill for biogenic or untreated municipal waste ('reactive organic landfill'). Landfill gas leachate collection system. Recultivation and monitoring for 150 years after closure. | Altered Ecoinvent process. **Included:** Transport to the WTS assumed included.  **Added IfT:** 50 km transport from WTS to end treatment. **Changed OtT:** disposal, polyethylene, 0.4% water, to municipal incineration  **TO:** Disposal, polyethylene, 0.4% water, to sanitary landfill |
| Doors (single = 1, double = 2) | L | DC Disposal, building, door, inner, glass-wood, to final disposal | Eco (alt) | CH | Diesel (transport)  Swiss municipal sanitary landfill for biogenic or untreated municipal waste ('reactive organic landfill'). Landfill gas leachate collection system. Recultivation and monitoring for 150 years after closure. (aluminium/wood/paint) Typical municipal waste landfill with surface and basic sealing meeting European limits for emissions. Includes landfill gas treatment, leachate treatment, sludge treatment and deposition. (plastics)  Landfill with renaturation after closure. 50% of the sites feature a base seal and leachate collection system (steel)  Average technologies | Altered Ecoinvent process.  Converted to a kg output (from m2)  **Included:** assumed transport to the WTS. **Added IfT:** 50 km transport from WTS to end treatment. **Changed:** Disposal, aluminium, 0% water, to municipal incineration  **TO:** Disposal, aluminium, 0% water, to sanitary landfill  **Changed:** Disposal, plastics, mixture, 15.3% water, to municipal incineration  **TO:** Landfill of plastic waste EU-27  **Changed:** Disposal, steel, 0% water, to municipal incineration  **TO:** Disposal, steel, 0% water, to inert material landfill  **Changed:** Disposal, wood untreated, 20% water, to municipal incineration  **TO:** Disposal wood untreated, 20% water, to sanitary landfill **Changed:** Disposal, emulsion paint, 0% water, to municipal incineration  **TO:** Disposal, emulsion paint, 0% water, to sanitary landfill |
|  | R | DC Recycling Disposal, building, door, inner, glass-wood, to final disposal | Eco (alt) | CH | Diesel (transport) | Altered Ecoinvent process.  **Included:** Transport to the WTS assumed included. **Added IfT:** 50 km transport from WTS to end treatment. **Deleted:** All Outputs to the Technosphere (waste treatments). |
| Glass Fibre Insulation | L | DC Disposal, building, mineral wool, to final disposal | Eco (alt) | CH | Diesel (transport)  Landfill with renaturation after closure. 50% of the sites feature a base seal and leachate collection system | Altered Ecoinvent processes  **Added IfT:** 0.015 tkm transport to WTS (same as construction processes).  **Added IfT:** 50 km transport from WTS to end treatment.  **Deleted:** particulate emissions from dismantling. |
|  | R | DC Disposal, building, mineral wool, to recycling | Eco (alt) | CH | Diesel (transport) | Altered Ecoinvent processes  **Added IfT:** 0.015 tkm transport to WTS (same as final disposal above).  **Added IfT:** 50 km transport from WTS to end treatment.  **Deleted:** particulate emissions from dismantling. |
| Gravel (Limestone) | L | DC Disposal, building, concrete gravel, to final disposal | Eco (alt) | CH | Diesel (transport) | Altered Ecoinvent process.  **Deleted:** Energy consumption for, and particulate emissions from demolition.  **Added IfT:** 50 km transport from WTS to end treatment. |
|  | R | DC Disposal, building, concrete gravel, to recycling | Eco (alt) | CH | Diesel (transport) | Altered Ecoinvent process.  **Deleted:** Energy consumption for, and particulate emissions from demolition.  **Added IfT:** 0.015 tkm transport to WTS (same as landfill process above).  **Added IfT**: 50 km transport from WTS to end treatment. |
| Linoleum | L | DC Disposal, building, polyvinylchloride products, to final disposal | Eco (alt) | CH | Diesel (transport)  Swiss municipal sanitary landfill for biogenic or untreated municipal waste ('reactive organic landfill'). Landfill gas leachate collection system. Recultivation and monitoring for 150 years after closure. | Altered Ecoinvent process.  **Included:** Transport to the WTS assumed included. **Added IfT:** 50 km transport from WTS to end treatment. **Changed:** Disposal, polyvinylchloride, 0.2% water, to municipal incineration  **TO:** Disposal, polyvinylchloride, 0.2% water, to sanitary landfill |
|  | R | DC Recycling Disposal, building, polyvinylchloride products, to final disposal | Eco (alt) | CH | Diesel (transport) | Altered Ecoinvent process.  **Deleted:** Disposal, polyvinylchloride, 0.2% water, to municipal incineration **Included:** Transport to the WTS assumed included. **Added IfT:** 50 km transport from WTS to end treatment. |
| Linoleum Plywood | L | DC Disposal, building, waste wood, untreated, to final disposal | Eco (alt) | CH | Diesel (transport)  Swiss municipal sanitary landfill for biogenic or untreated municipal waste ('reactive organic landfill'). Landfill gas leachate collection system. Recultivation and monitoring for 150 years after closure. | Altered Ecoinvent process. **Added IfT:** 50 km transport from WTS to end treatment. **Changed OtT:** Disposal, wood untreated, 20% water, to municipal incineration/CH U **TO**: Disposal, wood untreated, 20% water, to sanitary landfill/CH U |
|  | R | DC Recycling Disposal, building, waste wood, untreated, to final disposal | Eco (alt) | CH | Diesel (transport) | Altered Ecoinvent process. **Added IfT:** 50 km transport from WTS to end treatment. **Deleted OtT:** Disposal, wood untreated, 20% water, to municipal incineration/CH U |
| Paint | L | DC Disposal, building, paint on metal, to final disposal | Eco (alt) | CH | Diesel (transport) | Altered Ecoinvent process. **Included:** Transport to the WTS assumed included. **Added IfT:** 50 km transport from WTS to end treatment. |
| Precast Concrete | L | DC Disposal, building, reinforced concrete, to final disposal | Eco (alt) | CH | Diesel (transport)  Landfill with renaturation after closure. 50% of the sites feature a base seal and leachate collection system | Altered Ecoinvent process. **Included:** Transport to the WTS assumed included. **Added IfT:** 50 km transport from WTS to end treatment. **Deleted:** Impacts of dismantling (energy and particulates). |
|  | R | DC Disposal, building, reinforced concrete, to recycling | Eco (alt) | CH | Diesel (transport) | Altered Ecoinvent process. **Included:** Transport to the WTS assumed included. **Added IfT:** 50 km transport from WTS to end treatment. **Deleted:** Impacts of dismantling (energy and particulates). |
| Raised Floor (Steel pedestal & stringers) | L | DC Disposal, building, reinforcement steel, to final disposal | Eco (alt) | CH | Diesel (transport)  Landfill with renaturation after closure. 50% of the sites feature a base seal and leachate collection system | Disposal of reinforcement steel used as a proxy for all steel products.  **Deleted:** Impacts of dismantling (energy and particulates). **Added IfT:** 50 km transport from WTS to end treatment. |
|  | R | DC Recycling Steel and Iron | Eco (alt) | RER (CH) | Diesel (transport) | Empty process originally  **Added IfT:** 0.015 tkm transport to WTS (same as construction processes).  **Added IfT:** 50 km transport from WTS to end treatment. |
| Raised Floor (Particle Board) | L | DC Disposal, building, fibre board, to final disposal | Eco (alt)   ELCD process added | RER (CH)  EU-27 | Diesel (transport)  Typical municipal waste landfill with surface and basic sealing meeting European limits for emissions. Includes landfill gas treatment, leachate treatment, sludge treatment and deposition. (plastics)  Swiss municipal sanitary landfill for biogenic or untreated municipal waste ('reactive organic landfill'). Landfill gas leachate collection system. Recultivation and monitoring for 150 years after closure. (wood) | Altered Ecoinvent process  **Included:** Transport to the WTS assumed included. **Added IfT:** 50 km transport from WTS to end treatment.  **Changed:** Disposal, polyurethane, 0.2% water, to municipal incineration  **TO:** Landfill of plastic waste EU-27  **Changed:** Disposal, wood untreated, 20% water, to municipal incineration  **TO:** Disposal, wood untreated, 20%water, to sanitary landfill |
|  | R | DC Recycling Disposal, building, fibre board, to final disposal | Eco (alt) | RER (CH) | Diesel (transport) | Altered Ecoinvent process. **Included:** Transport to the WTS assumed included. **Added IfT:** 50 km transport from WTS to end treatment.  **Deleted:** Disposal, polyurethane, 0.2% water, to municipal incineration  **Deleted:** Disposal, wood untreated, 20% water, to municipal incineration |
| Raised Floor (ABS) | L | DC Landfill of plastic waste EU-27 | ELCD (alt) | EU-27 | Diesel (transport)  Typical municipal waste landfill with surface and basic sealing meeting European limits for emissions. Includes landfill gas treatment, leachate treatment, sludge treatment and deposition. | Ecoinvent process not used as burdens related to demolition were difficult to separate out.  **Added IfT:** 0.015 tkm transport to WTS (same as construction processes).  **Added IfT:** 50 km transport from WTS to end treatment. |
|  | R | DC Recycling Mixed Plastics | Eco (alt) | RER (CH) | Diesel (transport) | New process made up of Ecoinvent processes. **Added IfT:** 0.015 tkm transport to WTS (same as construction processes).  **Added IfT:** 50 km transport from WTS to end treatment. |
| RC (Concrete) | L | DC Disposal, building, concrete, not reinforced, to final disposal | Eco (alt) | CH | Diesel (transport)  Landfill with renaturation after closure. 50% of the sites feature a base seal and leachate collection system | Altered Ecoinvent process.  **Deleted:** Impacts of dismantling (energy and particulates). **Added IfT:** 50 km transport from WTS to end treatment. |
|  | R | DC Disposal, building, concrete, not reinforced, to recycling | Eco (alt) | CH | Diesel (transport) | Altered Ecoinvent process.  **Deleted:** Impacts of dismantling (energy and particulates). **Added IfT:** 0.015 tkm transport from WTS to end treatment (same as landfill above). **Added IfT:** 50 km transport from WTS to end treatment. |
| RC (Reinforcement Steel) | L | DC Disposal, building, reinforcement steel, to final disposal | Eco (alt) | CH | Diesel (transport)  Landfill with renaturation after closure. 50% of the sites feature a base seal and leachate collection system | Disposal of reinforcement steel used as a proxy for all steel products.  **Deleted:** Impacts of dismantling (energy and particulates). **Added IfT:** 50 km transport from WTS to end treatment. |
|  | R | DC Recycling Steel and Iron | Eco (alt) | RER (CH) | Diesel (transport) | Empty process originally  **Added IfT:** 0.015 tkm transport to WTS (same as construction processes).  **Added IfT:** 50 km transport from WTS to end treatment. |
| Sand | L | DC Disposal, building, concrete gravel, to final disposal | Eco (alt) | CH | Diesel (transport) | Altered Ecoinvent process.  **Deleted:** Energy consumption for, and particulate emissions from demolition.  **Added IfT:** 50 km transport from WTS to end treatment. |
|  | R | DC Disposal, building, concrete gravel, to recycling | Eco (alt) | CH | Diesel (transport) | Altered Ecoinvent process.  **Deleted:** Energy consumption for, and particulate emissions from demolition.  **Added IfT:** 0.015 tkm transport to WTS (same as landfill process above).  **Added IfT:** 50 km transport from WTS to end treatment. |
| Steel | L | DC Disposal, building, reinforcement steel, to final disposal | Eco (alt) | CH | Diesel (transport)  Landfill with renaturation after closure. 50% of the sites feature a base seal and leachate collection system | Disposal of reinforcement steel used as a proxy for all steel products.  **Deleted:** Impacts of dismantling (energy and particulates). **Added IfT:** 50 km transport from WTS to end treatment. |
|  | R | DC Recycling Steel and Iron | Eco (alt) | RER (CH) | Diesel (transport) | Empty process originally  **Added IfT:** 0.015 tkm transport to WTS (same as construction processes).  **Added IfT:** 50 km transport from WTS to end treatment. |
| SCT (Polyester Powder Coating) | L | DC Disposal, building, paint on metal, to final disposal | Eco (alt) | CH | Diesel (transport) | Altered Ecoinvent process  **Included:** Transport to the WTS assumed included. **Added IfT:** 50 km transport from WTS to end treatment. |
| SCT (Steel) | L | DC Disposal, building, reinforcement steel, to final disposal | Eco (alt) | CH | Diesel (transport)  Landfill with renaturation after closure. 50% of the sites feature a base seal and leachate collection system | Disposal of reinforcement steel used as a proxy for all steel products.  **Deleted:** Impacts of dismantling (energy and particulates). **Added IfT:** 50 km transport from WTS to end treatment. |
|  | R | DC Recycling Steel and Iron | Eco (alt) | RER (CH) | Diesel (transport) | Empty process originally  **Added IfT:** 0.015 tkm transport to WTS (same as construction processes).  **Added IfT:** 50 km transport from WTS to end treatment. |
| SCT (Glass Fibre Insulation) | L | DC Disposal, building, mineral wool, to final disposal | Eco (alt) | CH | Diesel (transport)  Landfill with renaturation after closure. 50% of the sites feature a base seal and leachate collection system | Altered Ecoinvent processes. **Added IfT:** 0.015 tkm transport to WTS (same as construction processes).  **Added IfT:** 50 km transport from WTS to end treatment.  **Deleted:** particulate emissions from dismantling. |
|  | R | DC Disposal, building, mineral wool, to recycling | Eco (alt) | CH | Diesel (transport) | Altered Ecoinvent processes. **Added IfT:** 0.015 tkm transport to WTS (same as final disposal above).  **Added IfT:** 50 km transport from WTS to end treatment.  **Deleted:** particulate emissions from dismantling. |
| Wall Covering (Gypsum Plasterboard) | L | DC Disposal, building, plaster board, gypsum plaster, to final disposal | Eco (alt) | CH | Diesel (transport)  Landfill with renaturation after closure. 50% of the sites feature a base seal and leachate collection system | Altered Ecoinvent process.  **Included:** Transport to the WTS assumed included. **Added IfT:** 50 km transport from WTS to end treatment. **Deleted:** diesel for and particulate emissions from dismantling. |
|  | R | DC Disposal, building, plaster board, gypsum plaster, to recycling | Eco (alt) | CH | Diesel (transport) | Altered Ecoinvent process. **Added IfT:** 0.015 tkm transport to WTS (same as final disposal process). **Added IfT:** 50 km transport from WTS to end treatment. **Deleted:** diesel for and particulate emissions from dismantling. |
| Wall Covering (Plaster inc. Water) | L | DC Disposal, building, plaster board, gypsum plaster, to final disposal | Eco (alt) | CH | Diesel (transport)  Landfill with renaturation after closure. 50% of the sites feature a base seal and leachate collection system | Altered Ecoinvent process. **Included:** Transport to the WTS assumed included. **Added IfT:** 50 km transport from WTS to end treatment. **Deleted:** diesel for and particulate emissions from dismantling. |
|  | R | DC Disposal, building, plaster board, gypsum plaster, to recycling | Eco (alt) | CH | Diesel (transport) | Altered Ecoinvent process.  **Added IfT:** 0.015 tkm transport to WTS (same as final disposal process). **Added IfT:** 50 km transport from WTS to end treatment. **Deleted:** diesel for and particulate emissions from dismantling. |
